# Supplementary material for: A theoretical study on the second-order nonlinear optical properties of Pt(ii) bis-acetylide complexes: substituent and redox effects
Source: Royal Society of Chemistry journal article supplement (doi:10.1039/d3cp04418a), 2024-01-01
Supplement: d3cp04418a1.pdf [file d3cp04418a1.pdf]

### Coordinates of all optimized structures

**1<sup>+</sup>**

|    |            |             |             |
|----|------------|-------------|-------------|
| Pt | 0.24251781 | 9.19899794  | 13.44366268 |
| N  | 2.10147602 | 11.57312294 | 13.47322642 |
| N  | 3.15288414 | 9.71164846  | 12.66515859 |
| H  | 3.94665266 | 10.31826225 | 12.51659608 |
| N  | 1.10956350 | 8.40209616  | 16.37650633 |
| C  | 2.04196892 | 10.27013299 | 13.15704364 |
| C  | 0.94145676 | 12.29742205 | 14.03125956 |
| H  | 1.31778377 | 12.95336025 | 14.82213096 |
| H  | 0.28445835 | 11.57163043 | 14.50890846 |
| C  | 4.30855325 | 12.23783509 | 14.44634386 |
| H  | 5.18246819 | 12.87328148 | 14.28610252 |
| H  | 3.85132627 | 12.52804775 | 15.39505473 |
| H  | 4.65250157 | 11.20603821 | 14.54530186 |
| C  | 3.31027076 | 12.40100223 | 13.29802304 |
| H  | 2.98321790 | 13.43848111 | 13.23336488 |
| H  | 3.77066129 | 12.19036339 | 12.32736637 |
| C  | 2.66377571 | 8.09112770  | 10.83463285 |
| H  | 1.58583151 | 8.10676660  | 10.98296961 |
| H  | 2.93797394 | 7.11752097  | 10.42070711 |
| H  | 2.91475222 | 8.85757872  | 10.09717906 |
| C  | 3.07444571 | 7.25683667  | 13.18672693 |
| H  | 3.51742648 | 7.49437827  | 14.15699399 |
| H  | 3.46983137 | 6.29362898  | 12.85645823 |
| H  | 1.99862684 | 7.14212975  | 13.31299324 |
| C  | 4.93395112 | 8.30186643  | 11.88598091 |
| H  | 5.22862376 | 9.05936259  | 11.15234253 |
| H  | 5.22788204 | 7.33192832  | 11.48365801 |

|   |             |             |             |
|---|-------------|-------------|-------------|
| H | 5.50120467  | 8.46775292  | 12.80664090 |
| C | 3.41900900  | 8.33093273  | 12.14764446 |
| C | 0.79309549  | 8.69398928  | 15.30051239 |
| C | 0.37636061  | 7.10787745  | 18.27446132 |
| H | -0.56587881 | 7.65668838  | 18.32446324 |
| H | 0.64022000  | 6.78319302  | 19.28270485 |
| H | 0.23271045  | 6.22191371  | 17.65321348 |
| C | 2.81802644  | 7.21599787  | 17.59520740 |
| H | 2.69542686  | 6.33323919  | 16.96497531 |
| H | 3.13732413  | 6.88953304  | 18.58661442 |
| H | 3.60491234  | 7.84270682  | 17.17064800 |
| C | 1.67718200  | 9.26704403  | 18.55697546 |
| H | 2.45460432  | 9.90846808  | 18.13698803 |
| H | 1.97083915  | 8.99169131  | 19.57155506 |
| H | 0.74614143  | 9.83432605  | 18.61076763 |
| C | 1.49920540  | 7.99444154  | 17.71579137 |
| C | -0.32608421 | 9.77167433  | 11.63732549 |
| C | -1.10102447 | 10.56794009 | 9.24673124  |
| C | -2.45751447 | 10.45939307 | 8.86007902  |
| H | -3.17106262 | 10.04625281 | 9.56366732  |
| C | -2.86300637 | 10.88025682 | 7.60383372  |
| H | -3.90496238 | 10.79601794 | 7.31508773  |
| C | -1.93154533 | 11.41339987 | 6.70767770  |
| C | -0.58686194 | 11.52674082 | 7.07454810  |
| H | 0.13171132  | 11.94068759 | 6.37561028  |
| C | -0.17163768 | 11.11170911 | 8.32940311  |
| H | 0.86846267  | 11.19529360 | 8.62354312  |
| C | -0.68495376 | 10.14264550 | 10.52329533 |
| C | -1.44131434 | 8.16462615  | 13.61966489 |

|   |             |             |             |
|---|-------------|-------------|-------------|
| C | -3.67662696 | 6.77344474  | 13.72633648 |
| C | -4.13740251 | 6.18866059  | 14.93332147 |
| H | -3.55109962 | 6.31802116  | 15.83561355 |
| C | -5.31818841 | 5.46831674  | 14.95294930 |
| H | -5.66771326 | 5.02396170  | 15.87819994 |
| C | -6.06361592 | 5.31149084  | 13.77813783 |
| C | -5.62322164 | 5.88068641  | 12.57759023 |
| H | -6.20641815 | 5.75297673  | 11.67247215 |
| C | -4.44510512 | 6.60523716  | 12.54544319 |
| H | -4.08961523 | 7.05080267  | 11.62376125 |
| C | -2.48339503 | 7.50629988  | 13.69096194 |
| C | 0.17556060  | 13.09060531 | 12.97751358 |
| H | -0.64862713 | 13.63401448 | 13.44624235 |
| H | 0.81171902  | 13.82374359 | 12.47486143 |
| H | -0.23854037 | 12.41977069 | 12.22407752 |
| H | -6.98825798 | 4.74496390  | 13.79867530 |
| H | -2.25291213 | 11.74054432 | 5.72478658  |

## 1

|    |            |             |             |
|----|------------|-------------|-------------|
| Pt | 0.52710782 | 9.37242438  | 13.33948152 |
| N  | 2.36430695 | 11.74928632 | 13.20186242 |
| N  | 3.40525130 | 9.86340751  | 12.44936923 |
| H  | 4.17644546 | 10.47379050 | 12.21975833 |
| N  | 0.91317607 | 8.33672559  | 16.26159177 |
| C  | 2.29864954 | 10.42614655 | 12.95674776 |
| C  | 1.21959146 | 12.48558688 | 13.77075945 |
| H  | 1.61814444 | 13.18824540 | 14.51095088 |
| H  | 0.59718957 | 11.77116102 | 14.30747310 |
| C  | 4.60477805 | 12.49465608 | 14.02397818 |

|   |             |             |             |
|---|-------------|-------------|-------------|
| H | 5.46319107  | 13.12807091 | 13.78461057 |
| H | 4.19038932  | 12.83111060 | 14.97721441 |
| H | 4.96194494  | 11.47235650 | 14.16393643 |
| C | 3.54531967  | 12.57948473 | 12.92164322 |
| H | 3.20072821  | 13.60859285 | 12.81638074 |
| H | 3.96346318  | 12.32230566 | 11.94235748 |
| C | 2.88719886  | 8.23270221  | 10.64409746 |
| H | 1.81151895  | 8.30680109  | 10.79117023 |
| H | 3.11986295  | 7.23723494  | 10.25493433 |
| H | 3.17106832  | 8.97037115  | 9.88851747  |
| C | 3.28513165  | 7.41865648  | 13.00377768 |
| H | 3.73163794  | 7.65942719  | 13.97173429 |
| H | 3.66129993  | 6.44430978  | 12.68067004 |
| H | 2.20714267  | 7.33541602  | 13.13291754 |
| C | 5.16322742  | 8.41486590  | 11.69393703 |
| H | 5.47261919  | 9.15978292  | 10.95237120 |
| H | 5.43894007  | 7.43499688  | 11.30143168 |
| H | 5.73121935  | 8.58246249  | 12.61412948 |
| C | 3.64838416  | 8.47529496  | 11.95365797 |
| C | 0.90145564  | 8.78700653  | 15.18425856 |
| C | 0.14505412  | 6.13848371  | 16.87533611 |
| H | -0.55746122 | 6.14442693  | 16.04048609 |
| H | -0.27317949 | 5.53070841  | 17.68130111 |
| H | 1.08102220  | 5.68183727  | 16.54579258 |
| C | 1.40166021  | 7.60085398  | 18.52645227 |
| H | 2.35181584  | 7.16068917  | 18.21538831 |
| H | 1.02012891  | 7.02968008  | 19.37556324 |
| H | 1.58674844  | 8.62545002  | 18.85694803 |
| C | -0.94606179 | 8.22530651  | 17.78996941 |

|   |             |             |             |
|---|-------------|-------------|-------------|
| H | -0.78806643 | 9.25596145  | 18.11546679 |
| H | -1.39084995 | 7.66483813  | 18.61576900 |
| H | -1.64278030 | 8.22359802  | 16.95031655 |
| C | 0.38328755  | 7.56980326  | 17.38289503 |
| C | -0.07737829 | 9.87807195  | 11.49865264 |
| C | -0.81070357 | 10.59716309 | 9.06444070  |
| C | -2.05171400 | 10.19039920 | 8.53769565  |
| H | -2.70169464 | 9.57558023  | 9.15039679  |
| C | -2.43807591 | 10.56865404 | 7.25691673  |
| H | -3.39905020 | 10.24428185 | 6.86912948  |
| C | -1.60045611 | 11.36024980 | 6.47056815  |
| C | -0.36836521 | 11.77152422 | 6.97870212  |
| H | 0.28991797  | 12.38794582 | 6.37352649  |
| C | 0.02360356  | 11.39587296 | 8.25881699  |
| H | 0.98201583  | 11.71529837 | 8.65497393  |
| C | -0.41104707 | 10.21236292 | 10.37521718 |
| C | -1.19185837 | 8.36659836  | 13.68840864 |
| C | -3.23287958 | 6.95185675  | 14.59162654 |
| C | -3.26689978 | 5.55165226  | 14.44056904 |
| H | -2.46814668 | 5.06609888  | 13.89013146 |
| C | -4.30584780 | 4.80148864  | 14.98068099 |
| H | -4.31250404 | 3.72339042  | 14.85019611 |
| C | -5.33700638 | 5.42488986  | 15.68338709 |
| C | -5.31974194 | 6.81114757  | 15.83736116 |
| H | -6.12053076 | 7.30710807  | 16.37784042 |
| C | -4.28378681 | 7.56723246  | 15.29972556 |
| H | -4.27403921 | 8.64569835  | 15.41602785 |
| C | -2.14751351 | 7.71761904  | 14.07980208 |
| C | 0.39419632  | 13.20751761 | 12.71003034 |

|                      |             |             |             |
|----------------------|-------------|-------------|-------------|
| H                    | -0.42153117 | 13.76009174 | 13.18466586 |
| H                    | 0.99451346  | 13.92443069 | 12.14171355 |
| H                    | -0.03444528 | 12.48519900 | 12.01483943 |
| H                    | -6.14742000 | 4.83721649  | 16.10281967 |
| H                    | -1.90530121 | 11.65386418 | 5.47099931  |
| <b>I<sup>r</sup></b> |             |             |             |
| Pt                   | 0.21718398  | 9.01874862  | 13.29399241 |
| N                    | 2.06697983  | 11.34607245 | 13.58028929 |
| N                    | 3.15213613  | 9.57330445  | 12.64404042 |
| H                    | 3.96787148  | 10.16751330 | 12.64281450 |
| N                    | 0.93875475  | 9.10891358  | 16.29509369 |
| C                    | 2.00357315  | 10.07056428 | 13.13855412 |
| C                    | 0.88436632  | 12.00497492 | 14.16504398 |
| H                    | 1.24012080  | 12.65313554 | 14.97355522 |
| H                    | 0.26533778  | 11.23656891 | 14.62300045 |
| C                    | 4.17857027  | 11.88369841 | 14.78524796 |
| H                    | 5.07430677  | 12.51314759 | 14.76753210 |
| H                    | 3.63375372  | 12.08052409 | 15.71128419 |
| H                    | 4.48909037  | 10.83712938 | 14.81475878 |
| C                    | 3.28194822  | 12.16433738 | 13.57428769 |
| H                    | 2.97174242  | 13.21112704 | 13.57254358 |
| H                    | 3.82920298  | 12.03232397 | 12.63379374 |
| C                    | 2.56345793  | 7.85432889  | 10.92161542 |
| H                    | 1.52343703  | 7.74265916  | 11.21883113 |
| H                    | 2.90664038  | 6.91218254  | 10.48127201 |
| H                    | 2.60215684  | 8.63538640  | 10.15888561 |
| C                    | 3.32947328  | 7.16335912  | 13.22979130 |
| H                    | 3.98115739  | 7.41414446  | 14.07170170 |

|   |             |             |             |
|---|-------------|-------------|-------------|
| H | 3.61767514  | 6.17854076  | 12.84765073 |
| H | 2.30830461  | 7.10743695  | 13.60390208 |
| C | 4.91705654  | 8.28774489  | 11.64971352 |
| H | 5.04051654  | 9.02703662  | 10.85104595 |
| H | 5.23632132  | 7.31952609  | 11.25963298 |
| H | 5.58852997  | 8.54921172  | 12.47583085 |
| C | 3.45294516  | 8.21353769  | 12.11759373 |
| C | 0.75726505  | 8.57228963  | 15.19348594 |
| C | 0.48289914  | 7.28609094  | 17.90109716 |
| H | -0.50147756 | 7.71650118  | 18.10439817 |
| H | 0.82423777  | 6.75482583  | 18.79739617 |
| H | 0.36816280  | 6.56964938  | 17.08421923 |
| C | 2.84334802  | 7.78306519  | 17.16742306 |
| H | 2.74824419  | 7.06151678  | 16.35293318 |
| H | 3.27642240  | 7.27930834  | 18.03925311 |
| H | 3.53491720  | 8.56681491  | 16.84152393 |
| C | 1.60308208  | 9.42574192  | 18.61311918 |
| H | 2.28751221  | 10.22435301 | 18.31103288 |
| H | 1.98241865  | 8.97181401  | 19.53550555 |
| H | 0.63187237  | 9.88255601  | 18.82155121 |
| C | 1.47051631  | 8.38748121  | 17.49350647 |
| C | -0.29920686 | 9.59203632  | 11.42189634 |
| C | -0.93069861 | 10.60096113 | 9.06265774  |
| C | -2.19948159 | 10.36345085 | 8.48601229  |
| H | -2.91041588 | 9.75913331  | 9.03919944  |
| C | -2.53535867 | 10.88696640 | 7.24349595  |
| H | -3.51964384 | 10.68607238 | 6.82772003  |
| C | -1.62359495 | 11.66597090 | 6.52741654  |
| C | -0.36511882 | 11.91258467 | 7.07934067  |

|                      |             |             |             |
|----------------------|-------------|-------------|-------------|
| H                    | 0.35618993  | 12.51757044 | 6.53500259  |
| C                    | -0.02287219 | 11.39194457 | 8.32183269  |
| H                    | 0.95645073  | 11.58750959 | 8.74711335  |
| C                    | -0.58427654 | 10.06923538 | 10.32880502 |
| C                    | -1.53980580 | 8.06396844  | 13.52630562 |
| C                    | -3.83040522 | 6.78901690  | 13.84653359 |
| C                    | -4.09683241 | 6.02837764  | 15.00680738 |
| H                    | -3.33329595 | 5.97869427  | 15.77607871 |
| C                    | -5.30419120 | 5.35845306  | 15.16836409 |
| H                    | -5.47899639 | 4.78125749  | 16.07321302 |
| C                    | -6.29027015 | 5.42200572  | 14.18211979 |
| C                    | -6.04636930 | 6.16907407  | 13.02810431 |
| H                    | -6.80425966 | 6.22836343  | 12.25064822 |
| C                    | -4.84071712 | 6.84039563  | 12.86040396 |
| H                    | -4.65352016 | 7.41940033  | 11.96226920 |
| C                    | -2.59996198 | 7.47262848  | 13.67827795 |
| C                    | 0.09290381  | 12.79429220 | 13.12706262 |
| H                    | -0.76248173 | 13.28720175 | 13.59992002 |
| H                    | 0.70571638  | 13.56718679 | 12.64886831 |
| H                    | -0.28046006 | 12.11995592 | 12.35495372 |
| H                    | -7.23341287 | 4.89815062  | 14.31076003 |
| H                    | -1.88963279 | 12.07377556 | 5.55633935  |
| <b>2<sup>+</sup></b> |             |             |             |
| Pt                   | 0.27757646  | 9.22686768  | 13.48825157 |
| N                    | 2.24895551  | 11.50936112 | 13.56410290 |
| N                    | 3.21916011  | 9.60032727  | 12.76049306 |
| H                    | 4.04855637  | 10.16387885 | 12.63882309 |
| N                    | 1.10949528  | 8.44699651  | 16.44109442 |



|   |             |             |             |
|---|-------------|-------------|-------------|
| N | -2.11262635 | 12.21746298 | 5.48920486  |
| N | -7.22241717 | 4.50239237  | 13.90448955 |
| O | -1.23904859 | 12.30982631 | 4.64035020  |
| O | -3.28809526 | 12.51036112 | 5.33445675  |
| O | -7.63962160 | 4.18012278  | 15.00573770 |
| O | -7.74583154 | 4.23144347  | 12.83561831 |
| C | 2.13144412  | 10.21536025 | 13.23360903 |
| C | 4.46351472  | 12.04052470 | 14.60057682 |
| H | 5.37441931  | 12.62874782 | 14.47003314 |
| H | 3.99931286  | 12.34527820 | 15.54128863 |
| H | 4.74864185  | 10.99046427 | 14.69477544 |
| C | 3.50621461  | 12.27256968 | 13.42967495 |
| H | 3.23742040  | 13.32680923 | 13.37097855 |
| H | 3.97786711  | 12.04844963 | 12.46767110 |
| C | 2.67207337  | 8.01502445  | 10.91551363 |
| H | 1.59432645  | 8.08298818  | 11.05088469 |
| H | 2.90211167  | 7.03139485  | 10.49898993 |
| H | 2.97146007  | 8.77166862  | 10.18595504 |
| C | 3.01354895  | 7.14999007  | 13.26843655 |
| H | 3.45869812  | 7.35974252  | 14.24400152 |
| H | 3.36206320  | 6.16923514  | 12.93766409 |
| H | 1.93197680  | 7.08856331  | 13.38398557 |
| C | 4.93750324  | 8.10702603  | 11.99338146 |
| H | 5.27784696  | 8.85208542  | 11.26703035 |
| H | 5.18758369  | 7.12555708  | 11.58963300 |
| H | 5.50186613  | 8.23967970  | 12.92107744 |
| C | 3.42311917  | 8.20959195  | 12.23826687 |
| C | 0.80303607  | 8.72448622  | 15.35981061 |
| C | 0.32410414  | 7.28912480  | 18.40680240 |

|   |             |             |             |
|---|-------------|-------------|-------------|
| H | -0.57348218 | 7.90854374  | 18.45317224 |
| H | 0.58603639  | 6.98701501  | 19.42237439 |
| H | 0.10194678  | 6.39111541  | 17.82738250 |
| C | 2.75195114  | 7.18661252  | 17.67610424 |
| H | 2.55056906  | 6.29016966  | 17.08683387 |
| H | 3.06808589  | 6.87792206  | 18.67405093 |
| H | 3.57355372  | 7.73518106  | 17.21108709 |
| C | 1.78710683  | 9.35577269  | 18.57160575 |
| H | 2.59986744  | 9.91948078  | 18.10914031 |
| H | 2.08341353  | 9.10127752  | 19.59070297 |
| H | 0.90157323  | 9.99209432  | 18.62076091 |
| C | 1.49732802  | 8.06532877  | 17.79111237 |
| C | -0.24719726 | 9.85270776  | 11.69071142 |
| C | -0.95739436 | 10.75275860 | 9.31709780  |
| C | -2.30079217 | 11.11851180 | 9.06491466  |
| H | -3.03234053 | 11.02307506 | 9.85812534  |
| C | -2.67722388 | 11.59643204 | 7.82185172  |
| H | -3.69791855 | 11.88382643 | 7.60845680  |
| C | -1.71030829 | 11.70549588 | 6.82436889  |
| C | -0.37853038 | 11.35192327 | 7.03432220  |
| H | 0.33321450  | 11.45413643 | 6.22632650  |
| C | -0.00406604 | 10.87892102 | 8.27935087  |
| H | 1.02453622  | 10.59654091 | 8.46881612  |
| C | -0.57538794 | 10.27197270 | 10.58394915 |
| C | -1.40694134 | 8.19681752  | 13.65877459 |
| C | -3.62069638 | 6.77122412  | 13.78433381 |
| C | -4.17468293 | 6.36798718  | 15.02538662 |
| H | -3.67205974 | 6.64599382  | 15.94369053 |
| C | -5.34424354 | 5.63235847  | 15.06491472 |

|   |             |             |             |
|---|-------------|-------------|-------------|
| H | -5.78663400 | 5.31425969  | 15.99921213 |
| C | -5.96438853 | 5.29544344  | 13.86180446 |
| C | -5.45140211 | 5.67269704  | 12.62134902 |
| H | -5.97307247 | 5.38466332  | 11.71869518 |
| C | -4.28234439 | 6.41000177  | 12.58294603 |
| H | -3.85856508 | 6.71779950  | 11.63490027 |
| C | -2.43573025 | 7.51851141  | 13.73753691 |
| C | 1.11639298  | 12.28912680 | 14.10485182 |
| C | 0.42626443  | 13.14351414 | 13.04681570 |
| H | 1.50746184  | 12.90846824 | 14.91742901 |
| H | 0.40601556  | 11.59485344 | 14.55255122 |
| H | -0.37675072 | 13.72616914 | 13.50463969 |
| H | 1.11642947  | 13.84649048 | 12.57386709 |
| H | -0.00695614 | 12.51219212 | 12.27015438 |

## 2

|    |             |             |             |
|----|-------------|-------------|-------------|
| Pt | 0.44464298  | 9.29653080  | 13.47944381 |
| N  | 2.24951712  | 11.70691933 | 13.44931206 |
| N  | 3.33584431  | 9.86085033  | 12.66160787 |
| H  | 4.10110723  | 10.48989574 | 12.46455870 |
| N  | 1.05862824  | 8.30808060  | 16.38971493 |
| N  | -1.77600565 | 11.92674331 | 5.27981146  |
| N  | -7.06596136 | 4.67535081  | 14.75581097 |
| O  | -1.20488723 | 11.38718229 | 4.33759363  |
| O  | -2.60589626 | 12.82261107 | 5.16482437  |
| O  | -7.20173398 | 4.10137849  | 15.83221051 |
| O  | -7.89334628 | 4.65201441  | 13.85084733 |
| C  | 2.21230414  | 10.39214267 | 13.16373317 |

|   |             |             |             |
|---|-------------|-------------|-------------|
| C | 4.46152368  | 12.45921962 | 14.34018666 |
| H | 5.31396009  | 13.11299061 | 14.13843029 |
| H | 4.02331264  | 12.75938241 | 15.29490372 |
| H | 4.83301214  | 11.43876647 | 14.45459157 |
| C | 3.42377211  | 12.56403063 | 13.21943542 |
| H | 3.06511962  | 13.59042831 | 13.14023470 |
| H | 3.86392425  | 12.34497775 | 12.24080483 |
| C | 2.87262896  | 8.24701018  | 10.82384022 |
| H | 1.79440614  | 8.27387922  | 10.96711523 |
| H | 3.14577915  | 7.27070464  | 10.41361696 |
| H | 3.13254260  | 9.01330310  | 10.08844294 |
| C | 3.27077528  | 7.40444130  | 13.17272398 |
| H | 3.70210109  | 7.64064704  | 14.14877236 |
| H | 3.67541511  | 6.44560444  | 12.83874307 |
| H | 2.19422577  | 7.28901765  | 13.28836791 |
| C | 5.13447914  | 8.46890422  | 11.89478800 |
| H | 5.43061047  | 9.23243044  | 11.16724463 |
| H | 5.43794931  | 7.50242470  | 11.49013244 |
| H | 5.69135773  | 8.63613492  | 12.82173973 |
| C | 3.61689218  | 8.48741850  | 12.14364253 |
| C | 0.89206246  | 8.71358467  | 15.31189808 |
| C | -0.27651431 | 6.87005486  | 17.77752287 |
| H | -1.13086812 | 7.54396062  | 17.69381699 |
| H | -0.32780131 | 6.35579288  | 18.73990492 |
| H | -0.34687599 | 6.12922316  | 16.97922937 |
| C | 2.25359940  | 6.70653598  | 17.74175350 |
| H | 2.20306277  | 5.95992793  | 16.94694739 |
| H | 2.26541754  | 6.18820282  | 18.70291879 |
| H | 3.18813128  | 7.26199075  | 17.63791455 |

|   |             |             |             |
|---|-------------|-------------|-------------|
| C | 1.13054054  | 8.73243504  | 18.76707122 |
| H | 2.05389220  | 9.30792750  | 18.67276826 |
| H | 1.11614552  | 8.26291001  | 19.75293870 |
| H | 0.28438709  | 9.41888332  | 18.69951660 |
| C | 1.04410266  | 7.65132068  | 17.68005557 |
| C | -0.13431048 | 9.83957367  | 11.64378057 |
| C | -0.79393514 | 10.61727032 | 9.21281270  |
| C | -1.74763472 | 11.63690927 | 9.00736007  |
| H | -2.23224301 | 12.08433190 | 9.86725772  |
| C | -2.07019014 | 12.06449994 | 7.73002938  |
| H | -2.79955838 | 12.84593248 | 7.56377780  |
| C | -1.44113044 | 11.47137073 | 6.63684566  |
| C | -0.50041404 | 10.45612120 | 6.80217967  |
| H | -0.03598635 | 10.01524701 | 5.93029102  |
| C | -0.18124242 | 10.03537592 | 8.08225980  |
| H | 0.54695121  | 9.24578827  | 8.22721281  |
| C | -0.44934931 | 10.19544182 | 10.52053322 |
| C | -1.27304462 | 8.27192747  | 13.71558368 |
| C | -3.48304118 | 6.89410149  | 14.12536673 |
| C | -3.70885774 | 6.20887977  | 15.33870720 |
| H | -2.95356173 | 6.25411227  | 16.11493326 |
| C | -4.87144612 | 5.48666842  | 15.54802585 |
| H | -5.05158725 | 4.95901510  | 16.47506129 |
| C | -5.83043509 | 5.44081590  | 14.53758210 |
| C | -5.64241142 | 6.10468589  | 13.32609523 |
| H | -6.40819383 | 6.04687963  | 12.56417755 |
| C | -4.47644943 | 6.82477130  | 13.12504448 |
| H | -4.31376296 | 7.34639201  | 12.18938691 |
| C | -2.29089396 | 7.63148892  | 13.91761232 |

|   |             |             |             |
|---|-------------|-------------|-------------|
| C | 1.08096339  | 12.40821300 | 14.01474984 |
| C | 0.26982801  | 13.15356942 | 12.95922728 |
| H | 1.45174842  | 13.09228705 | 14.78563233 |
| H | 0.45622776  | 11.66908451 | 14.51420001 |
| H | -0.56615284 | 13.67587093 | 13.43245518 |
| H | 0.87101635  | 13.89879870 | 12.43045879 |
| H | -0.12929098 | 12.44919913 | 12.22901220 |

## 2'

|    |             |             |             |
|----|-------------|-------------|-------------|
| Pt | 0.51841853  | 8.92452785  | 13.36670386 |
| N  | 2.34569926  | 11.32114711 | 13.27795556 |
| N  | 3.32949333  | 9.50750405  | 12.30914896 |
| H  | 4.06444028  | 10.14828275 | 12.04632869 |
| N  | 1.20514725  | 7.90134648  | 16.24643390 |
| N  | -1.18370698 | 12.88080115 | 5.64079115  |
| N  | -6.90708477 | 4.59290343  | 15.63307614 |
| O  | -0.30244980 | 13.68080213 | 5.25907229  |
| O  | -2.22358413 | 12.65425546 | 4.98809047  |
| O  | -6.80092624 | 3.68757381  | 16.48180697 |
| O  | -7.99514234 | 4.93256636  | 15.13366428 |
| C  | 2.26536913  | 10.01379156 | 12.95115566 |
| C  | 4.65283826  | 12.06036351 | 13.89798835 |
| H  | 5.47329491  | 12.72169681 | 13.60466748 |
| H  | 4.34019384  | 12.33434743 | 14.90856474 |
| H  | 5.03383440  | 11.03790865 | 13.93926661 |
| C  | 3.47747350  | 12.18777897 | 12.92367309 |
| H  | 3.11165737  | 13.21501185 | 12.91787505 |
| H  | 3.79018785  | 11.99695034 | 11.89128639 |

|   |             |             |             |
|---|-------------|-------------|-------------|
| C | 2.65821705  | 7.96710902  | 10.46815406 |
| H | 1.60388298  | 7.97669817  | 10.73564725 |
| H | 2.89111088  | 7.01170679  | 9.98804054  |
| H | 2.82101763  | 8.76743661  | 9.74141419  |
| C | 3.33141110  | 7.03605553  | 12.72142500 |
| H | 3.89830424  | 7.22401766  | 13.63703194 |
| H | 3.66782564  | 6.08831576  | 12.29112165 |
| H | 2.28081936  | 6.93409039  | 12.98656106 |
| C | 5.02688962  | 8.16503637  | 11.27626928 |
| H | 5.23051905  | 8.95688289  | 10.54651282 |
| H | 5.28423849  | 7.21558691  | 10.80404015 |
| H | 5.68829744  | 8.30472653  | 12.13741268 |
| C | 3.54834134  | 8.16062711  | 11.70247786 |
| C | 1.03086154  | 8.28996405  | 15.14085941 |
| C | -0.59496288 | 7.04153041  | 17.60993192 |
| H | -1.31838292 | 7.35490206  | 16.85573363 |
| H | -1.07216816 | 7.06389857  | 18.59358311 |
| H | -0.30282151 | 6.01223707  | 17.39025351 |
| C | 1.69284220  | 7.49318889  | 18.59575406 |
| H | 2.00817652  | 6.47256983  | 18.36733130 |
| H | 1.29020590  | 7.51155168  | 19.61180982 |
| H | 2.57391658  | 8.13930949  | 18.56166740 |
| C | 0.21799384  | 9.41861469  | 17.87672262 |
| H | 1.08264963  | 10.08495038 | 17.81959877 |
| H | -0.21805917 | 9.50151338  | 18.87598490 |
| H | -0.52145495 | 9.74873037  | 17.14438291 |
| C | 0.63130075  | 7.96566445  | 17.59828423 |
| C | -0.13106363 | 9.63919773  | 11.62059840 |
| C | -0.60829677 | 10.84025520 | 9.32679266  |

|   |             |             |             |
|---|-------------|-------------|-------------|
| C | -1.76988721 | 10.62633764 | 8.54139733  |
| H | -2.51691182 | 9.92638982  | 8.89973169  |
| C | -1.96056598 | 11.28621990 | 7.34422493  |
| H | -2.84606088 | 11.12307379 | 6.74443691  |
| C | -0.99118932 | 12.19427612 | 6.88104551  |
| C | 0.17022203  | 12.42815479 | 7.63880621  |
| H | 0.90142060  | 13.13146437 | 7.26287063  |
| C | 0.35207014  | 11.76324525 | 8.83311350  |
| H | 1.24657012  | 11.94190128 | 9.42194805  |
| C | -0.39242756 | 10.17774249 | 10.55118106 |
| C | -1.20161693 | 7.94026604  | 13.70428630 |
| C | -3.38307745 | 6.63713622  | 14.40441177 |
| C | -3.33301462 | 5.58772745  | 15.35672608 |
| H | -2.37078078 | 5.30631249  | 15.77012268 |
| C | -4.47350433 | 4.91978940  | 15.75678122 |
| H | -4.43519067 | 4.11915090  | 16.48346410 |
| C | -5.71558495 | 5.27996737  | 15.21254379 |
| C | -5.79721857 | 6.30808500  | 14.26017434 |
| H | -6.76570646 | 6.56444188  | 13.85175947 |
| C | -4.65082980 | 6.96982943  | 13.86533648 |
| H | -4.70916601 | 7.76521353  | 13.13064344 |
| C | -2.21363554 | 7.33035856  | 14.02368273 |
| C | 1.27057058  | 12.00028541 | 14.02451011 |
| C | 0.33686541  | 12.80769614 | 13.12801583 |
| H | 1.74952545  | 12.63887169 | 14.77680591 |
| H | 0.70655666  | 11.23649513 | 14.55732225 |
| H | -0.41491674 | 13.31710447 | 13.73821047 |
| H | 0.87204148  | 13.57035762 | 12.55398093 |
| H | -0.17242821 | 12.14496782 | 12.42865497 |



**3<sup>+</sup>**

|    |            |             |             |
|----|------------|-------------|-------------|
| Pt | 0.38878921 | 9.20568859  | 13.52258117 |
| N  | 2.38548374 | 11.46335731 | 13.50208978 |
| N  | 3.31837176 | 9.53551413  | 12.71014888 |
| H  | 4.14228420 | 10.09480631 | 12.54166683 |
| N  | 1.20903509 | 8.31728713  | 16.43061195 |
| C  | 2.24217404 | 10.16038065 | 13.20410783 |
| C  | 4.63590726 | 12.00607680 | 14.44837416 |
| H  | 5.54735110 | 12.58233468 | 14.27234325 |
| H  | 4.20594351 | 12.33683004 | 15.39660207 |
| H  | 4.91309290 | 10.95559623 | 14.55901761 |
| C  | 3.63804317 | 12.21501145 | 13.30667662 |
| H  | 3.37366870 | 13.26978927 | 13.23218584 |
| H  | 4.07820071 | 11.96643656 | 12.33529732 |
| C  | 2.72093492 | 7.95724966  | 10.87787016 |
| H  | 1.64785662 | 8.05685232  | 11.02846773 |
| H  | 2.92134386 | 6.96493144  | 10.46512064 |
| H  | 3.02780252 | 8.70237200  | 10.13933582 |
| C  | 3.07977660 | 7.08953913  | 13.22534444 |
| H  | 3.53895407 | 7.29410351  | 14.19570383 |
| H  | 3.41043495 | 6.10364664  | 12.88986000 |
| H  | 1.99911121 | 7.04948341  | 13.35337874 |
| C  | 5.00234619 | 8.01430913  | 11.92638460 |
| H  | 5.34594385 | 8.75327480  | 11.19476428 |
| H  | 5.23102412 | 7.02819177  | 11.52058242 |
| H  | 5.58006541 | 8.14020087  | 12.84698397 |
| C  | 3.49280517 | 8.14297864  | 12.19016148 |
| C  | 0.91109035 | 8.65049898  | 15.35885599 |

|   |             |             |             |
|---|-------------|-------------|-------------|
| C | 0.37587950  | 7.00521463  | 18.27196356 |
| H | -0.53328315 | 7.60681854  | 18.32732234 |
| H | 0.60532065  | 6.63103503  | 19.27173001 |
| H | 0.18899185  | 6.15223912  | 17.61693458 |
| C | 2.82793320  | 6.99207794  | 17.62735304 |
| H | 2.66261115  | 6.14125158  | 16.96374641 |
| H | 3.11375125  | 6.61291270  | 18.61043901 |
| H | 3.65595350  | 7.58521676  | 17.23380995 |
| C | 1.79649558  | 9.07135473  | 18.64647043 |
| H | 2.61475135  | 9.68087209  | 18.25757465 |
| H | 2.06013513  | 8.74459652  | 19.65426688 |
| H | 0.89956111  | 9.69048394  | 18.70845489 |
| C | 1.55536290  | 7.84338598  | 17.75576565 |
| C | -0.16407276 | 9.79016497  | 11.70602728 |
| C | -0.87698329 | 10.60423894 | 9.30703000  |
| C | -2.18143696 | 10.37670127 | 8.81010771  |
| H | -2.89312545 | 9.85429263  | 9.43946753  |
| C | -2.56412494 | 10.80226509 | 7.55704983  |
| H | -3.57508975 | 10.60132488 | 7.22951065  |
| C | -1.65628441 | 11.49141496 | 6.70727532  |
| C | -0.34451266 | 11.72127840 | 7.20461560  |
| H | 0.38691324  | 12.24082231 | 6.60062467  |
| C | 0.02414510  | 11.29069422 | 8.46035677  |
| H | 1.03140271  | 11.47945046 | 8.81520437  |
| C | -0.49396008 | 10.16875731 | 10.58785419 |
| C | -1.38595746 | 8.32033363  | 13.73960704 |
| C | -3.73298303 | 7.15400473  | 13.94655749 |
| C | -4.17244065 | 6.52244616  | 15.13699837 |
| H | -3.51422625 | 6.52098036  | 15.99850838 |

|   |             |             |             |
|---|-------------|-------------|-------------|
| C | -5.40456123 | 5.91788293  | 15.22295776 |
| H | -5.68855657 | 5.45167495  | 16.15646762 |
| C | -6.29293618 | 5.90180713  | 14.11027515 |
| C | -5.85416228 | 6.53480018  | 12.91262353 |
| H | -6.48975332 | 6.55065665  | 12.03784568 |
| C | -4.62015888 | 7.13674837  | 12.84034714 |
| H | -4.30605832 | 7.61211426  | 11.91817886 |
| C | -2.47902994 | 7.76945577  | 13.85811842 |
| C | 1.27481237  | 12.26166074 | 14.05747972 |
| C | 0.54834051  | 13.08154307 | 12.99590676 |
| H | 1.69406668  | 12.90617954 | 14.83667578 |
| H | 0.58011926  | 11.58011723 | 14.54628558 |
| H | -0.24054839 | 13.67839688 | 13.46102027 |
| H | 1.22257657  | 13.76957580 | 12.47825437 |
| H | 0.09239280  | 12.42148767 | 12.25732766 |
| N | -2.02973427 | 11.91637804 | 5.46211750  |
| N | -7.51625751 | 5.30321901  | 14.18874440 |
| C | -3.38035354 | 11.67120996 | 4.97297463  |
| H | -3.48223519 | 12.08309000 | 3.97199266  |
| H | -3.59988530 | 10.59977253 | 4.92066520  |
| H | -4.13103459 | 12.14807807 | 5.61164034  |
| C | -1.08203374 | 12.61976882 | 4.60723028  |
| H | -1.56296615 | 12.87109457 | 3.66515141  |
| H | -0.73907450 | 13.55118522 | 5.06953261  |
| H | -0.20689010 | 12.00077812 | 4.38411326  |
| C | -8.41239145 | 5.29555810  | 13.03725705 |
| H | -7.96061770 | 4.78096165  | 12.18362404 |
| H | -9.32934062 | 4.77313840  | 13.29738842 |
| H | -8.67759902 | 6.31226803  | 12.73126544 |

|   |             |            |             |
|---|-------------|------------|-------------|
| C | -7.94894589 | 4.66058924 | 15.42526023 |
| H | -7.99158031 | 5.37553225 | 16.25267006 |
| H | -8.94456893 | 4.24693409 | 15.28745168 |
| H | -7.27866140 | 3.84213354 | 15.70537962 |

### 3

|    |            |             |             |
|----|------------|-------------|-------------|
| Pt | 0.54363245 | 9.37528588  | 13.29823858 |
| N  | 2.55317866 | 11.61251069 | 13.29601001 |
| N  | 3.48060466 | 9.67705028  | 12.52184363 |
| H  | 4.30117968 | 10.23558479 | 12.33541933 |
| N  | 0.73800054 | 8.22959058  | 16.19770543 |
| C  | 2.39941519 | 10.30503085 | 13.00808752 |
| C  | 4.80976074 | 12.16103878 | 14.22115470 |
| H  | 5.72201550 | 12.73381372 | 14.03334760 |
| H  | 4.38584510 | 12.49937087 | 15.16954312 |
| H  | 5.08299324 | 11.11060719 | 14.34009555 |
| C  | 3.80192942 | 12.35933441 | 13.08536695 |
| H  | 3.53921937 | 13.41432920 | 13.00240434 |
| H  | 4.23690149 | 12.10151901 | 12.11350043 |
| C  | 2.90692394 | 8.14366200  | 10.64950965 |
| H  | 1.83534876 | 8.29527605  | 10.76403688 |
| H  | 3.07831111 | 7.14507024  | 10.23694003 |
| H  | 3.27100723 | 8.87962290  | 9.92726987  |
| C  | 3.16303224 | 7.23301701  | 12.99354041 |
| H  | 3.59441563 | 7.41004823  | 13.98192048 |
| H  | 3.47547953 | 6.24307669  | 12.65028724 |
| H  | 2.07829106 | 7.22887012  | 13.08741856 |
| C  | 5.15283656 | 8.12509786  | 11.77725481 |

|   |             |             |             |
|---|-------------|-------------|-------------|
| H | 5.54143742  | 8.86660852  | 11.07027194 |
| H | 5.36922253  | 7.13938270  | 11.36267979 |
| H | 5.69957966  | 8.22279273  | 12.72015395 |
| C | 3.63842178  | 8.29034837  | 11.98995915 |
| C | 0.80102691  | 8.70927406  | 15.13390147 |
| C | -0.23431877 | 6.08274657  | 16.69609658 |
| H | -0.88966682 | 6.17244102  | 15.82848639 |
| H | -0.74161547 | 5.48655238  | 17.45847661 |
| H | 0.67833765  | 5.56186326  | 16.39764323 |
| C | 1.04665662  | 7.38668928  | 18.45712482 |
| H | 1.97385118  | 6.88066711  | 18.17841268 |
| H | 0.57710025  | 6.82256708  | 19.26597356 |
| H | 1.29529953  | 8.38228724  | 18.83178711 |
| C | -1.20234948 | 8.22153760  | 17.62729991 |
| H | -0.98012621 | 9.22537194  | 17.99646191 |
| H | -1.73291400 | 7.67325018  | 18.40959663 |
| H | -1.85147276 | 8.30219992  | 16.75413021 |
| C | 0.09051004  | 7.47379880  | 17.26387833 |
| C | 0.04496439  | 9.97989424  | 11.45541404 |
| C | -0.54534998 | 10.82751801 | 9.02416262  |
| C | -1.79954629 | 10.57407635 | 8.44758035  |
| H | -2.53196719 | 10.01232686 | 9.01719600  |
| C | -2.11475565 | 11.01235903 | 7.16602796  |
| H | -3.09007395 | 10.76604983 | 6.76540187  |
| C | -1.19092449 | 11.74101060 | 6.39739975  |
| C | 0.06468213  | 12.00627281 | 6.97860105  |
| H | 0.79147887  | 12.60217987 | 6.43749375  |
| C | 0.37805069  | 11.55854868 | 8.25026631  |
| H | 1.35177477  | 11.78434878 | 8.67318882  |

|   |             |             |             |
|---|-------------|-------------|-------------|
| C | -0.22185257 | 10.37335749 | 10.33271092 |
| C | -1.25705797 | 8.48961663  | 13.55764636 |
| C | -3.42331915 | 7.20406513  | 14.35692892 |
| C | -3.53756588 | 5.80593202  | 14.21623952 |
| H | -2.73813030 | 5.26295911  | 13.72296148 |
| C | -4.63446163 | 5.11594763  | 14.70323821 |
| H | -4.65861013 | 4.03585605  | 14.60829292 |
| C | -5.69370682 | 5.78208037  | 15.34980240 |
| C | -5.58641279 | 7.17568155  | 15.48782456 |
| H | -6.37843430 | 7.74410253  | 15.95935371 |
| C | -4.47631400 | 7.86464601  | 15.00834298 |
| H | -4.42493342 | 8.94198146  | 15.12660802 |
| C | -2.26938243 | 7.90256654  | 13.90219308 |
| C | 1.44373941  | 12.41625228 | 13.84286990 |
| C | 0.71958605  | 13.22933201 | 12.77411743 |
| H | 1.86175838  | 13.06443184 | 14.62125000 |
| H | 0.74790142  | 11.73462522 | 14.32979429 |
| H | -0.07220052 | 13.82759220 | 13.23384111 |
| H | 1.39466945  | 13.91554328 | 12.25363166 |
| H | 0.26827200  | 12.56157334 | 12.03970828 |
| N | -1.49652951 | 12.24057818 | 5.11301115  |
| N | -6.78251861 | 5.04486859  | 15.86708492 |
| C | -2.86609264 | 12.11012083 | 4.65044520  |
| H | -2.98885296 | 12.69885714 | 3.73867053  |
| H | -3.15566081 | 11.07010093 | 4.42114058  |
| H | -3.55797773 | 12.50441096 | 5.39632288  |
| C | -0.52851181 | 11.98568894 | 4.05114701  |
| H | -0.72472440 | 12.65458004 | 3.20930364  |
| H | 0.48785076  | 12.17287152 | 4.39055504  |

|   |             |             |             |
|---|-------------|-------------|-------------|
| H | -0.57735708 | 10.94644149 | 3.68493997  |
| C | -7.73463826 | 5.75525716  | 16.70072731 |
| H | -8.35784769 | 6.47522848  | 16.14243388 |
| H | -8.40357282 | 5.03052820  | 17.17017192 |
| H | -7.21576327 | 6.29296585  | 17.49613181 |
| C | -7.43824774 | 4.10834101  | 14.95894800 |
| H | -6.70922684 | 3.52648204  | 14.39929562 |
| H | -8.04944461 | 3.40852985  | 15.53457717 |
| H | -8.09112879 | 4.62139709  | 14.23314279 |

**3'**

|    |            |             |             |
|----|------------|-------------|-------------|
| Pt | 0.31319964 | 9.07376179  | 13.40550387 |
| N  | 2.29720938 | 11.28522937 | 13.69898065 |
| N  | 3.28302708 | 9.44571908  | 12.78191801 |
| H  | 4.12268418 | 10.00526011 | 12.74647950 |
| N  | 1.13619873 | 9.18047005  | 16.37629510 |
| C  | 2.15803114 | 10.01832179 | 13.25016798 |
| C  | 4.40945438 | 11.64746671 | 14.96424149 |
| H  | 5.34652765 | 12.21369545 | 14.98299043 |
| H  | 3.85445956 | 11.86048452 | 15.88049326 |
| H  | 4.64520849 | 10.58148712 | 14.97543638 |
| C  | 3.56654595 | 12.01502876 | 13.73840763 |
| H  | 3.33064853 | 13.08098153 | 13.74974710 |
| H  | 4.12840681 | 11.86259008 | 12.80920231 |
| C  | 2.77243827 | 8.05776480  | 10.78231655 |
| H  | 1.69697767 | 8.18248791  | 10.89186263 |
| H  | 2.96937200 | 7.09555846  | 10.29807735 |
| H  | 3.13524102 | 8.85525671  | 10.12644104 |

|   |             |             |             |
|---|-------------|-------------|-------------|
| C | 3.00382779  | 6.97694368  | 13.05637516 |
| H | 3.46606556  | 7.05467533  | 14.04309514 |
| H | 3.27689909  | 6.01453733  | 12.61114544 |
| H | 1.92430958  | 7.00355911  | 13.19668144 |
| C | 4.99722638  | 7.99138719  | 11.94301792 |
| H | 5.38215312  | 8.78955377  | 11.29722291 |
| H | 5.23686041  | 7.03963377  | 11.46495967 |
| H | 5.52752640  | 8.03086559  | 12.90022719 |
| C | 3.47668912  | 8.11510014  | 12.14421009 |
| C | 0.86322913  | 8.61753865  | 15.30592110 |
| C | 0.51986199  | 7.55153636  | 18.12483029 |
| H | -0.37190491 | 8.14245964  | 18.35141571 |
| H | 0.83304993  | 7.02808867  | 19.03597899 |
| H | 0.24481143  | 6.81413120  | 17.36691725 |
| C | 2.87561193  | 7.62680770  | 17.23034271 |
| H | 2.61834386  | 6.88393534  | 16.47180931 |
| H | 3.28016966  | 7.11230133  | 18.10958771 |
| H | 3.65740413  | 8.27164099  | 16.81598476 |
| C | 1.99818816  | 9.52821927  | 18.62325048 |
| H | 2.77615584  | 10.18927494 | 18.22889116 |
| H | 2.36304703  | 9.07746059  | 19.55305273 |
| H | 1.12407417  | 10.14397602 | 18.85186124 |
| C | 1.63544382  | 8.45796598  | 17.58768260 |
| C | -0.19841885 | 9.65003064  | 11.53336020 |
| C | -0.81190290 | 10.64765091 | 9.16389721  |
| C | -2.12223423 | 10.57882191 | 8.65190646  |
| H | -2.88804619 | 10.10538958 | 9.25706376  |
| C | -2.44845690 | 11.08901121 | 7.39841718  |
| H | -3.47054949 | 10.98993206 | 7.04940268  |



|   |             |             |             |
|---|-------------|-------------|-------------|
| C | -1.48236128 | 11.71099516 | 6.59635486  |
| C | -0.17569067 | 11.80037013 | 7.10362910  |
| H | 0.58174892  | 12.31490491 | 6.51858695  |
| C | 0.15269212  | 11.27803203 | 8.34381214  |
| H | 1.16926616  | 11.36367832 | 8.71434716  |
| C | -0.47648547 | 10.12172792 | 10.43614721 |
| C | -1.49135142 | 8.21802395  | 13.66502825 |
| C | -3.84637020 | 7.07303693  | 14.01070133 |
| C | -4.17930347 | 6.39740649  | 15.20707150 |
| H | -3.44348543 | 6.36668919  | 16.00383872 |
| C | -5.41804232 | 5.80334503  | 15.38569482 |
| H | -5.65495500 | 5.32876404  | 16.33404108 |
| C | -6.39381726 | 5.83069151  | 14.37603187 |
| C | -6.07751805 | 6.49732481  | 13.18543291 |
| H | -6.79490343 | 6.54137155  | 12.37304632 |
| C | -4.83841950 | 7.10916723  | 13.01272456 |
| H | -4.61645112 | 7.62336464  | 12.08350661 |
| C | -2.58146980 | 7.68802375  | 13.83043986 |
| C | 1.14842668  | 12.01721329 | 14.26380360 |
| C | 0.42744929  | 12.85148344 | 13.20981285 |
| H | 1.52892866  | 12.64262672 | 15.07857404 |
| H | 0.47454722  | 11.28960760 | 14.71052937 |
| H | -0.40399466 | 13.39907117 | 13.66502565 |
| H | 1.09696804  | 13.58226733 | 12.74137788 |
| H | 0.02617708  | 12.19860152 | 12.43295787 |
| N | -1.76818261 | 12.27409199 | 5.31379368  |
| N | -7.65810700 | 5.20657793  | 14.61629197 |
| C | -3.16552197 | 12.51017717 | 5.00697213  |
| H | -3.23459160 | 13.12612668 | 4.10518296  |

|   |             |             |             |
|---|-------------|-------------|-------------|
| H | -3.74424109 | 11.58611117 | 4.82232190  |
| H | -3.64186220 | 13.05265306 | 5.82541289  |
| C | -1.07471510 | 11.63814381 | 4.19861479  |
| H | -1.14848906 | 12.27040631 | 3.30770455  |
| H | -0.01893643 | 11.50469137 | 4.43053950  |
| H | -1.49418125 | 10.64557442 | 3.95208677  |
| C | -8.74494745 | 5.58524160  | 13.73499557 |
| H | -8.64802541 | 5.18438332  | 12.70865992 |
| H | -9.68681156 | 5.20914040  | 14.14620823 |
| H | -8.81302911 | 6.67259427  | 13.67075993 |
| C | -7.59962353 | 3.76102887  | 14.80396357 |
| H | -6.80286981 | 3.49731561  | 15.49803350 |
| H | -8.54609670 | 3.40318540  | 15.22266022 |
| H | -7.41548327 | 3.21993696  | 13.85757880 |

**4<sup>+</sup>**

|    |               |               |              |
|----|---------------|---------------|--------------|
| Pt | -4.6029281262 | -1.437973082  | 5.0286541484 |
| N  | -3.1586986764 | -4.0492262609 | 5.6654135201 |
| H  | -3.1394038131 | -5.0434392882 | 5.8428994824 |
| N  | -5.3790022611 | -4.3496375818 | 5.201411496  |
| N  | -4.035072881  | -1.8441666411 | 1.9399674598 |
| C  | -4.3391405947 | -3.5140675316 | 5.3463127804 |
| C  | -1.8281017402 | -3.4186752702 | 5.9550462816 |
| C  | -1.3524858527 | -2.5440880434 | 4.7887009374 |
| H  | -1.4259529217 | -3.0816881829 | 3.8402720496 |
| H  | -0.3073410855 | -2.2686292048 | 4.9446792028 |
| H  | -1.9233575161 | -1.6191011503 | 4.7108503257 |
| C  | -1.8807058093 | -2.6197380092 | 7.262877699  |

|   |               |               |               |
|---|---------------|---------------|---------------|
| H | -2.5468863848 | -1.762527511  | 7.1855373232  |
| H | -0.8827423865 | -2.2517876422 | 7.5124891687  |
| H | -2.2262515795 | -3.2479105422 | 8.0875164023  |
| C | -0.8649290905 | -4.6065038891 | 6.1137351489  |
| H | -1.170798587  | -5.2643629435 | 6.933456273   |
| H | 0.1383894345  | -4.2483148806 | 6.3456187086  |
| H | -0.8037903539 | -5.1968964147 | 5.194857086   |
| C | -6.7338282551 | -3.857512823  | 4.8793434989  |
| H | -6.7731129365 | -2.7963353329 | 5.1169685105  |
| H | -7.4334155434 | -4.3534769282 | 5.5575571784  |
| C | -7.1308955319 | -4.0903051698 | 3.4247655358  |
| H | -8.1159478708 | -3.6573596882 | 3.2358371726  |
| H | -6.4155616466 | -3.6160149981 | 2.7490319906  |
| H | -7.1870299379 | -5.1521265392 | 3.1766232275  |
| C | -5.2501423971 | -5.8193125839 | 5.3081052355  |
| H | -6.2580613812 | -6.2167973812 | 5.4236722585  |
| H | -4.7344565385 | -6.0714890794 | 6.2416084176  |
| C | -4.5723233414 | -6.4750607688 | 4.10060221    |
| H | -4.4968285728 | -7.5532827625 | 4.2575189763  |
| H | -5.1507429902 | -6.3067055762 | 3.1915037004  |
| H | -3.5655175417 | -6.0910344888 | 3.9267840221  |
| C | -4.2258162977 | -1.6898089897 | 3.0706283035  |
| C | -3.7905426059 | -2.0263408596 | 0.515178542   |
| C | -4.7690802224 | -3.0993758466 | 0.0155466931  |
| H | -4.6112522765 | -4.0472788176 | 0.5341227898  |
| H | -4.6086525081 | -3.2625452965 | -1.0514480331 |
| H | -5.8045254176 | -2.7862725889 | 0.1615077987  |
| C | -2.3317928568 | -2.4791271427 | 0.3550966361  |
| H | -1.6425154903 | -1.7303798517 | 0.7495161611  |

|   |               |               |               |
|---|---------------|---------------|---------------|
| H | -2.114310474  | -2.6209466377 | -0.7048876379 |
| H | -2.1553845242 | -3.4254436911 | 0.8703743615  |
| C | -4.0387543616 | -0.6757004739 | -0.1716965755 |
| H | -5.0676050944 | -0.3427678467 | -0.0233525427 |
| H | -3.8634772669 | -0.7804487564 | -1.2437788157 |
| H | -3.3625403313 | 0.0899807198  | 0.2128545151  |
| C | -5.1123632008 | -1.2667977059 | 6.9272582434  |
| C | -5.8101936359 | -1.0780679371 | 9.462734469   |
| C | -6.6494101159 | -0.0359846692 | 9.9113608664  |
| H | -7.0325843796 | 0.7034321733  | 9.2217685232  |
| C | -6.9833113871 | 0.0331558952  | 11.2520871526 |
| C | -6.5221329162 | -0.8859074822 | 12.1879323255 |
| H | -6.7948265846 | -0.8113814635 | 13.2312955088 |
| C | -5.6962611323 | -1.9044836525 | 11.7254665893 |
| C | -5.3331575767 | -2.022173738  | 10.3962525885 |
| H | -4.6876800281 | -2.8314108723 | 10.0846743606 |
| C | -5.447840722  | -1.1768821129 | 8.1050088078  |
| C | -4.7278046521 | 0.5222409625  | 4.7781667864  |
| C | -4.8280638394 | 3.1435550632  | 4.502048552   |
| C | -4.8130695871 | 3.9745624488  | 5.6461604344  |
| H | -4.753010714  | 3.5492545941  | 6.6385232332  |
| C | -4.8751380477 | 5.3455121366  | 5.4839957476  |
| C | -4.9531870038 | 5.9488091151  | 4.2327192478  |
| H | -5.0016262504 | 7.0240977362  | 4.1300130449  |
| C | -4.9658315661 | 5.1143555291  | 3.1192964081  |
| C | -4.9060644232 | 3.7378606304  | 3.2220768349  |
| H | -4.9202215294 | 3.1293224698  | 2.328646527   |
| C | -4.7658267902 | 1.748179921   | 4.6374944231  |
| N | -4.8560221224 | 6.2146253338  | 6.6962695017  |

|   |               |               |               |
|---|---------------|---------------|---------------|
| O | -4.7800864211 | 5.6525621343  | 7.7761170268  |
| O | -4.9166251773 | 7.4170563096  | 6.513379036   |
| N | -5.0447025597 | 5.7298136519  | 1.7637753709  |
| O | -5.1087110319 | 6.9443979411  | 1.7109926579  |
| O | -5.0378194008 | 4.9674065248  | 0.8102894326  |
| N | -7.8733335452 | 1.1365805555  | 11.7140307197 |
| O | -8.1444136738 | 1.1677806001  | 12.9011975105 |
| O | -8.2630599321 | 1.9235949088  | 10.8668583735 |
| N | -5.185374761  | -2.910092908  | 12.6987661007 |
| O | -4.4727012627 | -3.7974199424 | 12.2550795398 |
| O | -5.516743551  | -2.7736760219 | 13.8625473414 |

#### 4

|    |             |             |            |
|----|-------------|-------------|------------|
| Pt | -4.60138536 | -1.52463667 | 5.15898576 |
| N  | -3.35005318 | -4.24661281 | 5.75919560 |
| H  | -3.41625845 | -5.23513534 | 5.95642558 |
| N  | -5.58692039 | -4.36348573 | 5.31380682 |
| N  | -3.93901290 | -1.54105902 | 2.09162096 |
| C  | -4.48333105 | -3.60255087 | 5.45092918 |
| C  | -1.99426980 | -3.71734741 | 6.10418755 |
| C  | -1.44562250 | -2.79587094 | 5.00854477 |
| H  | -1.53364315 | -3.26362051 | 4.02465280 |
| H  | -0.38924224 | -2.59311445 | 5.20161715 |
| H  | -1.96901782 | -1.84104749 | 4.98587518 |
| C  | -2.02618902 | -3.00116750 | 7.46055613 |
| H  | -2.66927540 | -2.12394098 | 7.43033546 |
| H  | -1.01804673 | -2.68324069 | 7.73962997 |
| H  | -2.40014422 | -3.66938909 | 8.24125250 |

|   |             |             |             |
|---|-------------|-------------|-------------|
| C | -1.10144275 | -4.96592454 | 6.19719232  |
| H | -1.45959128 | -5.65885810 | 6.96622070  |
| H | -0.08405574 | -4.68131352 | 6.46864631  |
| H | -1.05931693 | -5.49683636 | 5.24138643  |
| C | -6.89169508 | -3.75237719 | 4.99599700  |
| H | -6.86676342 | -2.71947597 | 5.33617951  |
| H | -7.64940300 | -4.26388019 | 5.59605581  |
| C | -7.24211316 | -3.81410014 | 3.51178985  |
| H | -8.18957892 | -3.29991939 | 3.33073171  |
| H | -6.47019819 | -3.31876363 | 2.91896403  |
| H | -7.34843886 | -4.84149801 | 3.15451267  |
| C | -5.57505513 | -5.83394554 | 5.41010896  |
| H | -6.60925934 | -6.15410715 | 5.53653344  |
| H | -5.06792620 | -6.13724650 | 6.33387237  |
| C | -4.96557440 | -6.53596775 | 4.19094213  |
| H | -4.96129758 | -7.61838387 | 4.34334239  |
| H | -5.54497597 | -6.32239632 | 3.29176990  |
| H | -3.93897211 | -6.21719376 | 4.00266429  |
| C | -4.16725433 | -1.59652374 | 3.23033307  |
| C | -3.67415208 | -1.28540263 | 0.69003403  |
| C | -4.72098304 | -2.05042047 | -0.13332907 |
| H | -4.65609334 | -3.12466260 | 0.05273136  |
| H | -4.54959955 | -1.87347947 | -1.19706850 |
| H | -5.72997030 | -1.71447641 | 0.11341546  |
| C | -2.25421191 | -1.78293621 | 0.38156752  |
| H | -1.51802874 | -1.25925815 | 0.99430401  |
| H | -2.02257454 | -1.59795134 | -0.66934526 |
| H | -2.16582562 | -2.85486062 | 0.57113616  |
| C | -3.79218150 | 0.23048179  | 0.46644871  |

|   |             |             |             |
|---|-------------|-------------|-------------|
| H | -4.79377178 | 0.58351652  | 0.71704519  |
| H | -3.59774755 | 0.46626175  | -0.58160105 |
| H | -3.06965898 | 0.77147590  | 1.07953592  |
| C | -5.10517077 | -1.35589852 | 7.08708945  |
| C | -5.68389342 | -1.27766112 | 9.65661811  |
| C | -6.82755945 | -0.62775950 | 10.15661075 |
| H | -7.51113094 | -0.12677601 | 9.48554213  |
| C | -7.07851075 | -0.63060459 | 11.52158291 |
| C | -6.24186429 | -1.24804685 | 12.44151942 |
| H | -6.45479157 | -1.23574985 | 13.49948971 |
| C | -5.11839616 | -1.88265858 | 11.92902914 |
| C | -4.82494533 | -1.91152266 | 10.57370075 |
| H | -3.93561729 | -2.41974903 | 10.22854747 |
| C | -5.39573299 | -1.30762445 | 8.26932993  |
| C | -4.73353565 | 0.46881857  | 4.91239094  |
| C | -4.81681838 | 3.01358651  | 4.24019657  |
| C | -5.05181841 | 4.06622416  | 5.14437919  |
| H | -5.21811888 | 3.86220869  | 6.19288195  |
| C | -5.06903553 | 5.37625538  | 4.68421403  |
| C | -4.86346619 | 5.71471307  | 3.35298997  |
| H | -4.88164077 | 6.74094632  | 3.01939621  |
| C | -4.63328056 | 4.66251404  | 2.47654319  |
| C | -4.60672451 | 3.33929493  | 2.88746518  |
| H | -4.42364631 | 2.55890094  | 2.16437589  |
| C | -4.78318627 | 1.65692746  | 4.64621832  |
| N | -5.31733453 | 6.47287369  | 5.65652457  |
| O | -5.49010768 | 6.16208408  | 6.82535523  |
| O | -5.33204415 | 7.61585668  | 5.22316413  |
| N | -4.40459645 | 4.96371452  | 1.04245632  |

|   |             |             |             |
|---|-------------|-------------|-------------|
| O | -4.43737928 | 6.13475959  | 0.69758901  |
| O | -4.19606560 | 4.01816688  | 0.29125246  |
| N | -8.29751379 | 0.05287221  | 12.02658962 |
| O | -8.48210533 | 0.05373762  | 13.23479960 |
| O | -9.03857016 | 0.56687567  | 11.20188209 |
| N | -4.19890584 | -2.56637032 | 12.87274578 |
| O | -3.23295615 | -3.14893499 | 12.39845747 |
| O | -4.46592709 | -2.50745756 | 14.06350264 |

**4'**

|    |             |             |            |
|----|-------------|-------------|------------|
| Pt | -4.75294377 | -0.83683264 | 5.34820044 |
| N  | -3.63637531 | -3.49039604 | 6.44387919 |
| H  | -3.79206938 | -4.36265737 | 6.93611769 |
| N  | -5.84621556 | -3.59547191 | 5.91205509 |
| N  | -3.92448813 | -1.28870316 | 2.36552109 |
| C  | -4.71164423 | -2.86893290 | 5.93948449 |
| C  | -2.24153590 | -3.00221555 | 6.65339652 |
| C  | -1.62847956 | -2.50525341 | 5.33848441 |
| H  | -1.78052535 | -3.23427572 | 4.53759677 |
| H  | -0.55308046 | -2.35744360 | 5.47088960 |
| H  | -2.05962819 | -1.55452228 | 5.02940082 |
| C  | -2.17581433 | -1.90882858 | 7.72834107 |
| H  | -2.75734268 | -1.03331725 | 7.44671803 |
| H  | -1.13583526 | -1.60063618 | 7.87246786 |
| H  | -2.55783461 | -2.27608412 | 8.68204634 |
| C  | -1.47455415 | -4.24391348 | 7.14150843 |
| H  | -1.93279560 | -4.65827287 | 8.04451674 |
| H  | -0.44117300 | -3.97821710 | 7.37328976 |



|   |             |             |             |
|---|-------------|-------------|-------------|
| H | -1.45971416 | -5.02395651 | 6.37327526  |
| C | -7.10446550 | -3.00731443 | 5.42565879  |
| H | -7.06800689 | -1.93489540 | 5.60115318  |
| H | -7.91287690 | -3.39778790 | 6.04921115  |
| C | -7.36865987 | -3.29459480 | 3.94913241  |
| H | -8.29320351 | -2.80490321 | 3.62980292  |
| H | -6.55126973 | -2.90421117 | 3.33870299  |
| H | -7.46901175 | -4.36495647 | 3.75022228  |
| C | -5.90942392 | -5.01819479 | 6.31213911  |
| H | -6.96418363 | -5.26111297 | 6.44278446  |
| H | -5.45686837 | -5.15602260 | 7.29890790  |
| C | -5.28411325 | -5.97186507 | 5.28870401  |
| H | -5.33121331 | -6.99795880 | 5.66295443  |
| H | -5.81031481 | -5.92872972 | 4.33267589  |
| H | -4.23577380 | -5.73266924 | 5.10217004  |
| C | -4.21779548 | -1.15543843 | 3.48510233  |
| C | -3.54250176 | -1.34555408 | 0.97387664  |
| C | -4.57118223 | -2.22023584 | 0.23996776  |
| H | -4.59231527 | -3.23003699 | 0.65599580  |
| H | -4.30972392 | -2.28540806 | -0.81870747 |
| H | -5.57120651 | -1.79023986 | 0.32296626  |
| C | -2.13885611 | -1.96713988 | 0.89938686  |
| H | -1.41908566 | -1.35922338 | 1.45069899  |
| H | -1.81720683 | -2.02490764 | -0.14307113 |
| H | -2.13547460 | -2.97446552 | 1.32165708  |
| C | -3.54176497 | 0.08699599  | 0.41942837  |
| H | -4.53019910 | 0.54088460  | 0.49842889  |
| H | -3.25569822 | 0.07864733  | -0.63443036 |
| H | -2.83321065 | 0.71740231  | 0.95778018  |

|   |             |             |             |
|---|-------------|-------------|-------------|
| C | -5.36263000 | -0.59006069 | 7.25043318  |
| C | -5.79466063 | -1.65400509 | 9.57442845  |
| C | -6.42606134 | -1.30962862 | 10.77851380 |
| H | -6.88170596 | -0.34165162 | 10.92388572 |
| C | -6.45702333 | -2.26610580 | 11.80731601 |
| C | -5.89741137 | -3.53107555 | 11.69985507 |
| H | -5.94215041 | -4.23894418 | 12.51301306 |
| C | -5.27032372 | -3.86138318 | 10.49209745 |
| C | -5.22340571 | -2.92885186 | 9.45327291  |
| H | -4.72657069 | -3.19294951 | 8.54126987  |
| C | -5.67158175 | -0.83907219 | 8.40565381  |
| C | -4.82947719 | 1.11524132  | 4.85757072  |
| C | -4.76619064 | 3.46833594  | 3.67647723  |
| C | -5.05243394 | 4.70959340  | 4.27256359  |
| H | -5.33172839 | 4.77059163  | 5.31433669  |
| C | -4.97258013 | 5.87243260  | 3.50240058  |
| C | -4.62025105 | 5.86471156  | 2.15926899  |
| H | -4.56567854 | 6.77676863  | 1.58569462  |
| C | -4.34001809 | 4.62927735  | 1.58357419  |
| C | -4.40751455 | 3.44525822  | 2.31626854  |
| H | -4.18286306 | 2.50727239  | 1.83444044  |
| C | -4.82326738 | 2.23955310  | 4.38497703  |
| N | -5.27332558 | 7.16938486  | 4.13223131  |
| O | -5.58408866 | 7.16883085  | 5.32084010  |
| O | -5.19798971 | 8.18223106  | 3.43751384  |
| N | -3.96541108 | 4.57199110  | 0.17410685  |
| O | -3.91017703 | 5.62971703  | -0.46197764 |
| O | -3.72112317 | 3.45885420  | -0.31347170 |
| N | -7.12224778 | -1.91523328 | 13.07496795 |

|   |             |             |             |
|---|-------------|-------------|-------------|
| O | -7.14645570 | -2.75180916 | 13.97570226 |
| O | -7.62328202 | -0.79668871 | 13.16708626 |
| N | -4.67862774 | -5.14201585 | 10.29778145 |
| O | -4.14239738 | -5.38616422 | 9.16449333  |
| O | -4.70420408 | -5.97866516 | 11.22708757 |

**5<sup>+</sup>**

|    |              |            |             |
|----|--------------|------------|-------------|
| Pt | -8.06253194  | 1.30809651 | 16.23113590 |
| N  | -6.90063597  | 3.68422161 | 17.66438014 |
| N  | -7.08594936  | 1.89183834 | 19.06613054 |
| H  | -6.63699238  | 2.47990360 | 19.75370367 |
| N  | -11.03430575 | 2.02041173 | 16.95337225 |
| C  | -7.26677769  | 2.40157720 | 17.83990569 |
| C  | -5.77584702  | 4.34985228 | 15.53498423 |
| H  | -4.94803413  | 4.83567432 | 16.05956356 |
| H  | -5.93335708  | 4.88597588 | 14.59516919 |
| H  | -5.48744267  | 3.32366599 | 15.30416762 |
| C  | -7.05742620  | 4.36093616 | 16.36243540 |
| H  | -7.39005085  | 5.38426037 | 16.56431193 |
| H  | -7.85979530  | 3.86434138 | 15.81866458 |
| C  | -7.35092566  | 5.13033729 | 19.65468434 |
| H  | -8.04274340  | 5.76203398 | 19.09270246 |
| H  | -6.87225331  | 5.74934644 | 20.41747324 |
| H  | -7.94071446  | 4.36238551 | 20.15967573 |
| C  | -6.30358641  | 4.52039961 | 18.71969968 |
| H  | -5.74045052  | 5.31213100 | 18.22513311 |
| H  | -5.55371519  | 3.94673160 | 19.27449667 |
| C  | -7.27116801  | 0.49981052 | 19.57919277 |

|   |              |             |             |
|---|--------------|-------------|-------------|
| C | -8.69079409  | -0.02130216 | 19.32375382 |
| H | -9.43825673  | 0.70772170  | 19.64637601 |
| H | -8.84465978  | -0.94451776 | 19.88793030 |
| H | -8.85504343  | -0.24417202 | 18.27052756 |
| C | -7.04914270  | 0.61090803  | 21.09675187 |
| H | -6.04730424  | 0.98776005  | 21.32894258 |
| H | -7.14118470  | -0.37037512 | 21.56396422 |
| H | -7.78647756  | 1.27365412  | 21.55956879 |
| C | -6.22331117  | -0.43983183 | 18.96921332 |
| H | -6.33672003  | -0.51439322 | 17.88926049 |
| H | -6.32344603  | -1.44020340 | 19.39940587 |
| H | -5.21276373  | -0.07812430 | 19.17699287 |
| C | -9.92869990  | 1.77402891  | 16.69158570 |
| C | -12.43095939 | 2.23636026  | 17.26755453 |
| C | -12.69334791 | 3.74964013  | 17.24465424 |
| H | -12.07642770 | 4.26370244  | 17.98454481 |
| H | -13.74246651 | 3.94259736  | 17.47768265 |
| H | -12.47628041 | 4.16772647  | 16.25980807 |
| C | -13.26588331 | 1.51235622  | 16.20016550 |
| H | -13.05353912 | 1.91034245  | 15.20615140 |
| H | -14.32827328 | 1.65215191  | 16.41079374 |
| H | -13.04940778 | 0.44256594  | 16.19739941 |
| C | -12.68995790 | 1.65098360  | 18.66460557 |
| H | -12.46724162 | 0.58255937  | 18.68604544 |
| H | -13.73945977 | 1.79112677  | 18.93131419 |
| H | -12.07442182 | 2.14953770  | 19.41620426 |
| C | -6.22725783  | 0.77413483  | 15.64363110 |
| C | -4.19454150  | -0.27084636 | 14.35570600 |
| C | -4.61488345  | -0.95233705 | 13.20062492 |

|   |              |             |             |
|---|--------------|-------------|-------------|
| H | -5.67546914  | -0.99038134 | 12.99230420 |
| C | -3.68612439  | -1.62056482 | 12.37678530 |
| C | -2.33424279  | -1.61696292 | 12.73078025 |
| H | -1.61466753  | -2.09195650 | 12.08416447 |
| C | -1.89107152  | -0.94796937 | 13.89591822 |
| C | -2.84119230  | -0.27039077 | 14.70015423 |
| H | -2.54559291  | 0.24126496  | 15.60424399 |
| C | -5.19658477  | 0.35638404  | 15.14518453 |
| C | -8.66486467  | 0.22749035  | 14.63784454 |
| C | -9.05464325  | -1.26472577 | 12.49809088 |
| C | -10.01401826 | -0.95585964 | 11.52489488 |
| H | -10.63746670 | -0.08972420 | 11.68944846 |
| C | -10.15651956 | -1.75160589 | 10.35525064 |
| C | -9.31574085  | -2.86618061 | 10.18489214 |
| H | -9.42334468  | -3.48345217 | 9.30961186  |
| C | -8.34966172  | -3.19414783 | 11.15330345 |
| C | -8.22351152  | -2.37913214 | 12.30969062 |
| H | -7.48384761  | -2.59352763 | 13.06663265 |
| C | -8.89737083  | -0.45244852 | 13.65280829 |
| N | -0.56057303  | -0.94145651 | 14.23690243 |
| N | -4.15776877  | -2.32966978 | 11.26292549 |
| N | -7.52005688  | -4.27811317 | 10.98400259 |
| N | -11.10268385 | -1.42755334 | 9.41486954  |
| C | -0.09021265  | -0.15389077 | 15.36892000 |
| H | -0.50367228  | -0.51927348 | 16.31487865 |
| H | 0.99347828   | -0.22152472 | 15.42890323 |
| H | -0.35598055  | 0.90229610  | 15.26045566 |
| C | 0.40774063   | -1.67588461 | 13.43790255 |
| H | 1.38353397   | -1.62765909 | 13.91541325 |

|   |              |             |             |
|---|--------------|-------------|-------------|
| H | 0.13004372   | -2.73117557 | 13.35103510 |
| H | 0.50386755   | -1.26034090 | 12.42758786 |
| C | -5.13393998  | -1.69989597 | 10.37254629 |
| H | -4.63345896  | -1.09734568 | 9.60156532  |
| H | -5.72775293  | -2.47232272 | 9.87993720  |
| H | -5.81426358  | -1.05668248 | 10.92149454 |
| C | -3.24504910  | -3.21657199 | 10.56277907 |
| H | -3.82032529  | -3.84581077 | 9.88122220  |
| H | -2.49561706  | -2.67407020 | 9.96693332  |
| H | -2.72772432  | -3.86576749 | 11.27019144 |
| C | -6.53900236  | -4.64592967 | 11.99912721 |
| H | -6.09825557  | -5.60493338 | 11.73584548 |
| H | -5.73344065  | -3.90483443 | 12.06484924 |
| H | -7.00359007  | -4.75422759 | 12.98203392 |
| C | -7.61477345  | -5.08321626 | 9.77629748  |
| H | -7.45431589  | -4.47637598 | 8.87842871  |
| H | -6.85565273  | -5.86125247 | 9.79721956  |
| H | -8.59454127  | -5.56629507 | 9.69074816  |
| C | -11.98067675 | -0.27879718 | 9.60209789  |
| H | -11.41449361 | 0.65547628  | 9.66953914  |
| H | -12.65301472 | -0.19995145 | 8.75116718  |
| H | -12.59200712 | -0.38039129 | 10.50443012 |
| C | -11.24974224 | -2.24258491 | 8.21977164  |
| H | -12.03615556 | -1.83091513 | 7.59198431  |
| H | -10.32488447 | -2.26215710 | 7.63215747  |
| H | -11.52088079 | -3.27519040 | 8.46768148  |

|    |              |             |             |
|----|--------------|-------------|-------------|
| Pt | -7.73845324  | 0.96868118  | 15.79624931 |
| N  | -6.72128427  | 3.50334883  | 17.05144189 |
| N  | -6.46025029  | 1.73197360  | 18.46472894 |
| H  | -5.97316867  | 2.38283200  | 19.06420591 |
| N  | -10.79071430 | 0.98510463  | 16.46673223 |
| C  | -6.88965843  | 2.18596650  | 17.27730566 |
| C  | -6.02598961  | 4.29852843  | 14.78510757 |
| H  | -5.21012141  | 4.90804077  | 15.18503151 |
| H  | -6.39845170  | 4.79214155  | 13.88291099 |
| H  | -5.62482760  | 3.32332398  | 14.50810890 |
| C  | -7.16084893  | 4.13112685  | 15.79102889 |
| H  | -7.61134821  | 5.09672190  | 16.04682918 |
| H  | -7.94869404  | 3.51021313  | 15.36723864 |
| C  | -7.03469402  | 4.90971787  | 19.09446822 |
| H  | -7.88258986  | 5.43852447  | 18.65276892 |
| H  | -6.52506685  | 5.59542307  | 19.77683549 |
| H  | -7.43483791  | 4.07887538  | 19.67916243 |
| C  | -6.07924123  | 4.42492429  | 18.00038148 |
| H  | -5.70947966  | 5.27525691  | 17.42681570 |
| H  | -5.18164345  | 3.96326308  | 18.42591909 |
| C  | -6.37272569  | 0.34046545  | 18.99819509 |
| C  | -7.70782074  | -0.40482531 | 18.88719050 |
| H  | -8.52684114  | 0.19940136  | 19.28496412 |
| H  | -7.65093465  | -1.33388740 | 19.46079665 |
| H  | -7.94022879  | -0.66111618 | 17.85463933 |
| C  | -6.02564381  | 0.51493635  | 20.48658181 |
| H  | -5.07891638  | 1.05109624  | 20.61730459 |
| H  | -5.91329968  | -0.45973481 | 20.96393280 |
| H  | -6.81136791  | 1.06269358  | 21.01546861 |

|   |              |             |             |
|---|--------------|-------------|-------------|
| C | -5.25198796  | -0.43314105 | 18.29095341 |
| H | -5.45258801  | -0.53443229 | 17.22618057 |
| H | -5.15132355  | -1.43122812 | 18.72736580 |
| H | -4.29589789  | 0.08688522  | 18.40204499 |
| C | -9.63387283  | 1.07070665  | 16.33183598 |
| C | -12.13262085 | 0.51244832  | 16.14613831 |
| C | -13.11444720 | 1.09218708  | 17.16906563 |
| H | -12.85894622 | 0.77090990  | 18.18148271 |
| H | -14.12640526 | 0.74808517  | 16.94454205 |
| H | -13.10863776 | 2.18426531  | 17.14084099 |
| C | -12.45294319 | 0.98976659  | 14.72069954 |
| H | -12.43972234 | 2.08063483  | 14.66349488 |
| H | -13.44740362 | 0.63908302  | 14.43434619 |
| H | -11.72674135 | 0.58905502  | 14.01226108 |
| C | -12.09610409 | -1.02320146 | 16.20397171 |
| H | -11.37188958 | -1.41415185 | 15.48798824 |
| H | -13.08255021 | -1.42057076 | 15.95305371 |
| H | -11.82684323 | -1.36828626 | 17.20488930 |
| C | -5.88632343  | 0.74186445  | 15.06941364 |
| C | -3.37240007  | 0.52169742  | 14.28123740 |
| C | -3.04030879  | 0.49854465  | 12.92005293 |
| H | -3.83718738  | 0.59486863  | 12.19453939 |
| C | -1.70326600  | 0.40576676  | 12.51298048 |
| C | -0.70120116  | 0.32357753  | 13.49643012 |
| H | 0.32534403   | 0.18309282  | 13.19551749 |
| C | -1.01568268  | 0.36333511  | 14.86441162 |
| C | -2.35696530  | 0.46572024  | 15.24716397 |
| H | -2.62775822  | 0.54231850  | 16.29267538 |
| C | -4.73257238  | 0.64143856  | 14.69117543 |



|   |              |             |             |
|---|--------------|-------------|-------------|
| C | -8.53765984  | -0.19799818 | 14.35080820 |
| C | -10.09250680 | -1.61126322 | 12.74625431 |
| C | -10.73116953 | -0.99065115 | 11.66256832 |
| H | -10.52957002 | 0.05590497  | 11.47406641 |
| C | -11.64894885 | -1.69678960 | 10.87508406 |
| C | -11.91655126 | -3.04079573 | 11.18676312 |
| H | -12.57112334 | -3.61118275 | 10.54656188 |
| C | -11.29966380 | -3.67404030 | 12.27928868 |
| C | -10.38576695 | -2.94803942 | 13.05307883 |
| H | -9.92113880  | -3.39251676 | 13.92370482 |
| C | -9.22151418  | -0.85953976 | 13.58822616 |
| N | -0.00846651  | 0.32628481  | 15.86013605 |
| N | -1.38408750  | 0.41971206  | 11.13746653 |
| N | -11.60327422 | -5.01061904 | 12.62444643 |
| N | -12.30474441 | -1.04297277 | 9.80712344  |
| C | -0.16449155  | -0.66981940 | 16.91500384 |
| H | 0.11892548   | -1.68110493 | 16.57669133 |
| H | 0.46891548   | -0.40552576 | 17.76643361 |
| H | -1.19352740  | -0.71235218 | 17.26447957 |
| C | 1.37129797   | 0.45503764  | 15.43213230 |
| H | 2.00053861   | 0.61660285  | 16.31083695 |
| H | 1.75683189   | -0.43599690 | 14.90559808 |
| H | 1.48602737   | 1.31971423  | 14.77653063 |
| C | 0.01453138   | 0.49393882  | 10.76253815 |
| H | 0.57666907   | -0.43465089 | 10.96567052 |
| H | 0.08269733   | 0.69393240  | 9.69081235  |
| H | 0.50634602   | 1.31619561  | 11.28503623 |
| C | -2.14764770  | -0.46093968 | 10.25969061 |
| H | -2.03348260  | -0.13215058 | 9.22345136  |

|   |              |             |             |
|---|--------------|-------------|-------------|
| H | -1.80974037  | -1.50854830 | 10.32827225 |
| H | -3.20754485  | -0.43594337 | 10.49915682 |
| C | -10.47999185 | -5.91176467 | 12.86179136 |
| H | -10.82440754 | -6.78726541 | 13.41865393 |
| H | -10.02276660 | -6.26004738 | 11.92053927 |
| H | -9.70424011  | -5.42833417 | 13.45014040 |
| C | -12.69155137 | -5.66425808 | 11.92326395 |
| H | -12.45762487 | -5.90696616 | 10.87179152 |
| H | -12.92847501 | -6.60070099 | 12.43359956 |
| H | -13.58642208 | -5.03991760 | 11.94215807 |
| C | -11.47385950 | -0.29114192 | 8.87206438  |
| H | -10.95863197 | -0.95037876 | 8.15351367  |
| H | -12.09776891 | 0.40732159  | 8.30807450  |
| H | -10.71703399 | 0.28806143  | 9.39497631  |
| C | -13.38366516 | -1.74515346 | 9.13912014  |
| H | -13.91018720 | -1.04477865 | 8.48663588  |
| H | -13.04219547 | -2.59013004 | 8.51572620  |
| H | -14.10158350 | -2.12317974 | 9.86893192  |

**5**

|    |              |            |             |
|----|--------------|------------|-------------|
| Pt | -8.25141779  | 0.97441611 | 16.49578247 |
| N  | -7.68546640  | 3.57262163 | 17.84335744 |
| N  | -7.09243311  | 1.82924515 | 19.18892548 |
| H  | -6.77922737  | 2.53422953 | 19.84046363 |
| N  | -10.94125703 | 2.09455783 | 17.48780972 |
| C  | -7.58520434  | 2.23399972 | 18.00261642 |
| C  | -7.14782100  | 4.42437762 | 15.56808125 |
| H  | -6.39132933  | 5.11758060 | 15.95422126 |

|   |              |             |             |
|---|--------------|-------------|-------------|
| H | -7.58548643  | 4.86842665  | 14.66828650 |
| H | -6.65632986  | 3.49169268  | 15.28620565 |
| C | -8.23586711  | 4.14441151  | 16.60000229 |
| H | -8.77244680  | 5.05945565  | 16.87280314 |
| H | -8.97456535  | 3.44947881  | 16.20767161 |
| C | -8.45125238  | 4.75333133  | 19.89548057 |
| H | -9.36597984  | 5.08174882  | 19.39703532 |
| H | -8.17334604  | 5.50152575  | 20.64518141 |
| H | -8.68498212  | 3.81706114  | 20.40622928 |
| C | -7.33144846  | 4.55724603  | 18.86806899 |
| H | -7.11905258  | 5.49885399  | 18.35770815 |
| H | -6.38816868  | 4.28420644  | 19.35595931 |
| C | -6.75239094  | 0.45685320  | 19.65272833 |
| C | -7.95755950  | -0.48664296 | 19.56305638 |
| H | -8.82155316  | -0.06049971 | 20.07806180 |
| H | -7.70493038  | -1.44592174 | 20.02672984 |
| H | -8.24692939  | -0.66307645 | 18.52803223 |
| C | -6.36228837  | 0.62434845  | 21.13170827 |
| H | -5.50335430  | 1.29635520  | 21.24620740 |
| H | -6.08115831  | -0.34064778 | 21.55792018 |
| H | -7.19694957  | 1.02243781  | 21.71791698 |
| C | -5.55809009  | -0.09826140 | 18.86496975 |
| H | -5.79255895  | -0.18335140 | 17.80519069 |
| H | -5.28285069  | -1.08750432 | 19.24546807 |
| H | -4.69103224  | 0.56248332  | 18.96417629 |
| C | -10.10153729 | 1.19897647  | 17.30984796 |
| C | -12.18649203 | 1.91608169  | 18.29650615 |
| C | -11.80632217 | 1.58001045  | 19.74563679 |
| H | -11.24857417 | 0.64080741  | 19.77311608 |

|   |              |             |             |
|---|--------------|-------------|-------------|
| H | -12.69357848 | 1.48466425  | 20.38229843 |
| H | -11.16447326 | 2.36397003  | 20.16034707 |
| C | -12.94297551 | 3.24834185  | 18.24572516 |
| H | -12.32294710 | 4.05229651  | 18.65395606 |
| H | -13.87518519 | 3.20071440  | 18.81988114 |
| H | -13.18253340 | 3.50744561  | 17.21086311 |
| C | -13.04208595 | 0.79443093  | 17.69313700 |
| H | -13.28923169 | 1.02406032  | 16.65309921 |
| H | -13.97542070 | 0.65891562  | 18.25241618 |
| H | -12.48292114 | -0.14406396 | 17.70034403 |
| C | -6.43725496  | 0.76976014  | 15.61127137 |
| C | -4.58573698  | 0.05740598  | 13.89520189 |
| C | -5.00872407  | -1.07133407 | 13.16310141 |
| H | -5.98298291  | -1.47091187 | 13.40174584 |
| C | -4.21989002  | -1.61473111 | 12.14426287 |
| C | -2.96145830  | -1.02620473 | 11.88162153 |
| H | -2.30647374  | -1.46191308 | 11.14323590 |
| C | -2.53379037  | 0.10030311  | 12.59523910 |
| C | -3.34752668  | 0.64308245  | 13.59433601 |
| H | -3.04459494  | 1.54206923  | 14.11842562 |
| C | -5.47006385  | 0.56399122  | 14.88746431 |
| C | -8.87022525  | -0.14373329 | 14.93609516 |
| C | -8.96685228  | -1.41487694 | 12.63422035 |
| C | -8.27261375  | -0.77610943 | 11.58864080 |
| H | -7.84709026  | 0.19824252  | 11.78821847 |
| C | -8.14308778  | -1.36870026 | 10.33012520 |
| C | -8.72420933  | -2.63257722 | 10.11228570 |
| H | -8.56936256  | -3.13837499 | 9.17097662  |
| C | -9.43761722  | -3.27633653 | 11.13425901 |

|   |              |             |             |
|---|--------------|-------------|-------------|
| C | -9.56195195  | -2.66449323 | 12.38334486 |
| H | -10.14353722 | -3.13430323 | 13.16753966 |
| C | -9.02954514  | -0.78122039 | 13.90350255 |
| N | -1.28105924  | 0.72933184  | 12.31721019 |
| N | -4.67994588  | -2.70125256 | 11.38310391 |
| N | -10.04346726 | -4.55396219 | 10.93199837 |
| N | -7.44432275  | -0.68861915 | 9.30397716  |
| C | -0.34887521  | 0.78864549  | 13.43600906 |
| H | 0.13297637   | -0.18701943 | 13.63263617 |
| H | 0.43870219   | 1.51942388  | 13.22412614 |
| H | -0.85981621  | 1.09640670  | 14.34592061 |
| C | -0.61464270  | 0.36999353  | 11.08300362 |
| H | 0.20148380   | 1.07579807  | 10.90025619 |
| H | -0.17690317  | -0.64643157 | 11.08974932 |
| H | -1.31194425  | 0.43562279  | 10.24609893 |
| C | -3.73740929  | -3.39203695 | 10.52948222 |
| H | -2.90017603  | -3.85489175 | 11.08033589 |
| H | -4.26076987  | -4.17749504 | 9.98279251  |
| H | -3.31251990  | -2.71176019 | 9.78549577  |
| C | -5.74946884  | -3.52211064 | 11.93678322 |
| H | -6.03132473  | -4.28077057 | 11.20635020 |
| H | -5.45617789  | -4.02064091 | 12.87387698 |
| H | -6.64081938  | -2.92910847 | 12.12671064 |
| C | -9.58826230  | -5.61143269 | 11.82635236 |
| H | -10.29055753 | -6.45077304 | 11.79552555 |
| H | -8.58748109  | -5.99181092 | 11.54932593 |
| H | -9.53510634  | -5.25305170 | 12.85189783 |
| C | -10.16742194 | -5.02274001 | 9.56775904  |
| H | -9.20785013  | -5.33425608 | 9.11254643  |

|   |              |             |             |
|---|--------------|-------------|-------------|
| H | -10.83466912 | -5.88980350 | 9.54822588  |
| H | -10.60585028 | -4.24485567 | 8.94045965  |
| C | -6.12795797  | -0.14102325 | 9.62780408  |
| H | -5.34133850  | -0.90510805 | 9.54737917  |
| H | -5.89494721  | 0.68254292  | 8.94520106  |
| H | -6.09460170  | 0.24001296  | 10.64427357 |
| C | -7.48342413  | -1.24947363 | 7.97207416  |
| H | -7.07797465  | -0.51721603 | 7.26804950  |
| H | -6.88910794  | -2.17658417 | 7.86371913  |
| H | -8.51200744  | -1.46476869 | 7.67513512  |
