# Supplementary material for: A theoretical study on the second-order nonlinear optical properties of Pt(ii) bis-acetylide complexes: substituent and redox effects
Source: Royal Society of Chemistry journal article supplement (doi:10.1039/d3cp04418a), 2024-01-01
Supplement: d3cp04418a2.pdf [file d3cp04418a2.pdf]

## Supporting Information

### **A theoretical study on second-order nonlinear optical properties of Pt(II) bis-acetylide complexes: substituent and redox effects**

Liting Sun, Yingying Wang, Yuanyuan Zhao\* and Yongqing Qiu\*

*Institute of Functional Material Chemistry, Faculty of Chemistry, Northeast Normal  
University, Changchun, 130024, China*

---

\*Corresponding Author. Fax: +86043185099291

E-mail addresses: [yuanyuan-zhao@outlook.com](mailto:yuanyuan-zhao@outlook.com) (Y. Y. Zhao)

\*Corresponding Author. Fax: +86043185098768.

E-mail addresses: [qiuyq466@nenu.edu.cn](mailto:qiuyq466@nenu.edu.cn) (Y. Q. Qiu)

## General Comments

**Table S1** Calculated squared spin operator  $\langle S^2 \rangle$  of complexes 1<sup>+/-</sup>-5<sup>+/-</sup>.

**Table S2** Weights of Pt, L<sub>1</sub>, L<sub>2</sub>, L<sub>3</sub> and L<sub>4</sub> ligands contributed to frontier molecular orbital.

**Table S3** Obtained  $\lambda$  (nm),  $\Delta E_{ge}$  (eV),  $f_{os}$ ,  $\Delta\mu_{ge}$  and major molecular orbital contributions of all studied complexes at the B3LYP-D3/6-311+G(d)/SDD level of theory.

**Table S4** The dynamic  $\beta_{HRS}$ , DR,  $\beta_J$ ,  $\rho$ , and  $\Phi(\beta_J)$  values of complexes 1-5 obtained at wavelength of 1064 nm and 1340 nm employing CAM-B3LYP/6-311+G(d)/SDD level of theory in DCM solvent.

**Fig. S1** Spin density diagrams for one-electron reduced and oxidized species of complexes 1-5.

**Fig. S2** Simulated absorption spectra of complex 1 in DCM solvent by four functionals and the experimental result (inset)<sup>44</sup> (The units of Abs: L/mol/cm).

**Fig. S3** Molecular orbitals involved in crucial charge transitions of complexes 1-5 and 1<sup>+/-</sup>-5<sup>+/-</sup>.

**Fig. S4** Relationship between the  $\beta_{tot}$  values and the corresponding  $\Delta\mu_{eg}f_{os}/\Delta E^3$  values for complexes 1-5.

**Fig. S5** Plots of  $-z\rho_{yy}^{(2)}$  for all studied complexes at the CAM-B3LYP/6-311G+(d)/SDD level of theory. Purple color represents a positive

value and blue color represents a negative value.

**Table S1** Calculated squared spin operator  $\langle S^2 \rangle$  of complexes 1<sup>+/-</sup>-5<sup>+/-</sup>.

| Complex        | $\langle S^2 \rangle$ | eigenvalue | Complex        | $\langle S^2 \rangle$ | eigenvalue |
|----------------|-----------------------|------------|----------------|-----------------------|------------|
| 1 <sup>+</sup> | 0.757                 | 0.75       | 3 <sup>-</sup> | 0.751                 | 0.75       |
| 1 <sup>-</sup> | 0.752                 | 0.75       | 4 <sup>+</sup> | 0.757                 | 0.75       |
| 2 <sup>+</sup> | 0.757                 | 0.75       | 4 <sup>-</sup> | 0.752                 | 0.75       |
| 2 <sup>-</sup> | 0.756                 | 0.75       | 5 <sup>+</sup> | 0.756                 | 0.75       |
| 3 <sup>+</sup> | 0.756                 | 0.75       | 5 <sup>-</sup> | 0.751                 | 0.75       |

**Table S2** Weights of Pt, L<sub>1</sub>, L<sub>2</sub>, L<sub>3</sub> and L<sub>4</sub> ligands contributed to frontier molecular orbital.

| Complex | Frontier MOs | Pt     | L <sub>1</sub> | L <sub>2</sub> | L <sub>3</sub> | L <sub>4</sub> |
|---------|--------------|--------|----------------|----------------|----------------|----------------|
| 1       | L            | 13.94% | 40.44%         | 3.12%          | 27.97%         | 14.53%         |
|         | H            | 10.34% | 81.68%         | 2.68%          | 2.57%          | 2.73%          |
| 2       | L            | 1.29%  | 83.42%         | 13.57%         | 0.90%          | 0.82%          |
|         | H            | 13.72% | 3.76%          | 80.88%         | 0.23%          | 1.41%          |
| 3       | L            | 15.10% | 33.89%         | 5.49%          | 31.19%         | 14.33%         |
|         | H            | 5.62%  | 89.51%         | 1.33%          | 1.63%          | 1.91%          |
| 4       | L            | 0.020% | 0.020%         | 99.70%         | 0.25%          | 0.01%          |
|         | H            | 15.70% | 12.61%         | 69.98%         | 0.31%          | 1.40%          |
| 5       | L            | 15.43% | 28.51%         | 5.67%          | 36.60%         | 13.80%         |
|         | H            | 0.022% | 99.91%         | 0.006%         | 0.004%         | 0.058%         |

**Table S3** Obtained  $\lambda$  (nm),  $\Delta E_{ge}$  (eV),  $f_{os}$ ,  $\Delta\mu_{ge}$  and major molecular orbital contributions of all studied complexes at the B3LYP-D3/6-311+G(d)/SDD level of theory.

| <b>Complex</b>       | $\lambda$ | $\Delta E_{ge}$ | $f_{os}$ | $\Delta\mu_{ge}$ | <b>Major contributions</b>                                                                                               |
|----------------------|-----------|-----------------|----------|------------------|--------------------------------------------------------------------------------------------------------------------------|
| <b>1<sup>+</sup></b> | 589       | 2.11            | 0.239    |                  | $\beta H-8 \rightarrow \beta L(68\%), \beta H-7 \rightarrow \beta L(27\%)$                                               |
|                      | 310       | 4.00            | 0.322    |                  | $\alpha H \rightarrow \alpha L(58\%)$                                                                                    |
| <b>1</b>             | 306       | 4.06            | 0.839    | 1.426            | H $\rightarrow$ L(95%)                                                                                                   |
|                      | 276       | 4.49            | 0.395    | 3.472            | H-2 $\rightarrow$ L(64%), H-1 $\rightarrow$ L+1(28%)                                                                     |
| <b>1<sup>-</sup></b> | 663       | 1.87            | 0.082    |                  | $\alpha H \rightarrow \alpha L+1(97\%)$                                                                                  |
|                      | 342       | 3.63            | 0.229    |                  | $\beta H \rightarrow \beta L(48\%)$                                                                                      |
| <b>2<sup>+</sup></b> | 613       | 2.02            | 0.146    |                  | $\beta H-7 \rightarrow \beta L(90\%)$                                                                                    |
|                      | 363       | 3.42            | 0.462    |                  | $\alpha H-2 \rightarrow \alpha L(32\%), \beta H \rightarrow \beta L+1(14\%)$                                             |
| <b>2</b>             | 426       | 2.91            | 0.358    | 8.605            | H $\rightarrow$ L(81%)                                                                                                   |
|                      | 399       | 3.11            | 0.632    | 6.624            | H-1 $\rightarrow$ L+1(58%), H-1 $\rightarrow$ L(23%)                                                                     |
| <b>2<sup>-</sup></b> | 422       | 2.94            | 0.654    |                  | $\alpha H-2 \rightarrow \alpha L(17\%), \beta H \rightarrow \beta L(55\%)$                                               |
|                      | 399       | 3.11            | 0.315    |                  | $\alpha H-4 \rightarrow \alpha L(22\%), \beta H-1 \rightarrow \beta L(36\%)$                                             |
| <b>3<sup>+</sup></b> | 712       | 1.74            | 0.206    |                  | $\beta H-2 \rightarrow \beta L(78\%)$                                                                                    |
|                      | 345       | 3.60            | 0.690    |                  | $\alpha H-1 \rightarrow \alpha L(32\%), \alpha H \rightarrow \alpha L(32\%)$                                             |
| <b>3</b>             | 335       | 3.70            | 0.945    | 5.989            | H $\rightarrow$ L(90%)                                                                                                   |
|                      | 287       | 4.32            | 0.465    | 2.694            | H-1 $\rightarrow$ L+4(45%), H-1 $\rightarrow$ L+2(23%)                                                                   |
| <b>3<sup>-</sup></b> | 736       | 1.69            | 0.083    |                  | $\alpha H \rightarrow \alpha L(94\%)$                                                                                    |
|                      | 356       | 3.49            | 0.220    |                  | $\alpha H-1 \rightarrow \alpha L(15\%), \beta H \rightarrow \beta L(43\%)$                                               |
| <b>4<sup>+</sup></b> | 623       | 1.99            | 0.112    |                  | $\beta H-6 \rightarrow \beta L(88\%)$                                                                                    |
|                      | 590       | 2.10            | 0.156    |                  | $\beta H-9 \rightarrow \beta L(53\%), \beta H-10 \rightarrow \beta L(18\%)$                                              |
| <b>4</b>             | 309       | 4.02            | 0.684    | 1.487            | H $\rightarrow$ L+4(93%)                                                                                                 |
|                      | 272       | 4.56            | 0.297    | 3.456            | H-1 $\rightarrow$ L+5(65%)                                                                                               |
| <b>4<sup>-</sup></b> | 330       | 3.76            | 0.339    |                  | $\beta H \rightarrow \beta L+4(32\%),$<br>$\alpha H-1 \rightarrow \alpha L+3(28\%), \beta H \rightarrow \beta L+3(20\%)$ |

|       |     |      |       |       |                                                                                                         |
|-------|-----|------|-------|-------|---------------------------------------------------------------------------------------------------------|
|       | 305 | 4.07 | 0.148 |       | $\beta\text{H-7}\rightarrow\beta\text{L+2}(33\%),$<br>$\beta\text{H-6}\rightarrow\beta\text{L+2}(15\%)$ |
| $5^+$ | 319 | 3.89 | 0.253 |       | $\alpha\text{H-1}\rightarrow\alpha\text{L}(43\%), \beta\text{H-1}\rightarrow\beta\text{L+1}(40\%)$      |
|       | 271 | 4.58 | 0.142 |       | $\alpha\text{H-2}\rightarrow\alpha\text{L+1}(42\%)$                                                     |
| $5$   | 300 | 4.13 | 0.406 | 3.371 | $\text{H-3}\rightarrow\text{L}(74\%)$                                                                   |
|       | 274 | 4.53 | 0.330 | 1.770 | $\text{H-1}\rightarrow\text{L+5}(38\%), \text{H-6}\rightarrow\text{L}(22\%)$                            |
| $5^-$ | 644 | 1.93 | 0.091 |       | $\alpha\text{H}\rightarrow\alpha\text{L}(83\%)$                                                         |
|       | 341 | 3.64 | 0.078 |       | $\beta\text{H-2}\rightarrow\beta\text{L}(13\%)$                                                         |

Note: H = HOMO, L = LUMO.

**Table S4** The dynamic  $\beta_{\text{HRS}}$ , DR,  $\beta_{\text{J}}$ ,  $\rho$ , and  $\Phi(\beta_{\text{J}})$  values of complexes 1-5 obtained at wavelength of 1064 nm and 1340 nm employing CAM-B3LYP/6-311+G(d)/SDD level of theory in DCM solvent.

| Complex                 | $\beta_{\text{HRS}}$ | DR   | $ \beta_{\text{J=1}} $ | $ \beta_{\text{J=3}} $ | $\rho$ | $\Phi(\beta_{\text{J=1}})$ | $\Phi(\beta_{\text{J=3}})$ |
|-------------------------|----------------------|------|------------------------|------------------------|--------|----------------------------|----------------------------|
| $\lambda=1064\text{nm}$ |                      |      |                        |                        |        |                            |                            |
| <b>1</b>                | $7.90 \times 10^2$   | 2.09 | $8.41 \times 10^2$     | $2.20 \times 10^3$     | 2.62   | 0.28                       | 0.72                       |
| <b>2</b>                | $1.22 \times 10^4$   | 4.28 | $2.17 \times 10^4$     | $2.16 \times 10^4$     | 1.01   | 0.50                       | 0.50                       |
| <b>3</b>                | $2.35 \times 10^3$   | 3.67 | $3.93 \times 10^3$     | $4.70 \times 10^3$     | 1.20   | 0.45                       | 0.55                       |
| <b>4</b>                | $2.26 \times 10^3$   | 7.29 | $4.63 \times 10^3$     | $1.92 \times 10^3$     | 0.42   | 0.71                       | 0.29                       |
| <b>5</b>                | $5.61 \times 10^2$   | 6.28 | $1.11 \times 10^3$     | $6.42 \times 10^2$     | 0.58   | 0.63                       | 0.37                       |
| $\lambda=1340\text{nm}$ |                      |      |                        |                        |        |                            |                            |
| <b>1</b>                | $6.96 \times 10^2$   | 2.09 | $7.43 \times 10^2$     | $1.95 \times 10^3$     | 2.62   | 0.28                       | 0.72                       |
| <b>2</b>                | $7.84 \times 10^3$   | 4.16 | $1.38 \times 10^4$     | $1.42 \times 10^4$     | 1.03   | 0.49                       | 0.51                       |
| <b>3</b>                | $1.77 \times 10^3$   | 3.58 | $2.82 \times 10^3$     | $3.49 \times 10^3$     | 1.24   | 0.45                       | 0.55                       |

|          |                    |      |                    |                    |      |      |      |
|----------|--------------------|------|--------------------|--------------------|------|------|------|
| <b>4</b> | $1.80 \times 10^3$ | 6.93 | $3.65 \times 10^3$ | $1.72 \times 10^3$ | 0.47 | 0.68 | 0.32 |
| <b>5</b> | $4.79 \times 10^2$ | 6.24 | $9.48 \times 10^2$ | $5.53 \times 10^2$ | 0.58 | 0.63 | 0.37 |

---

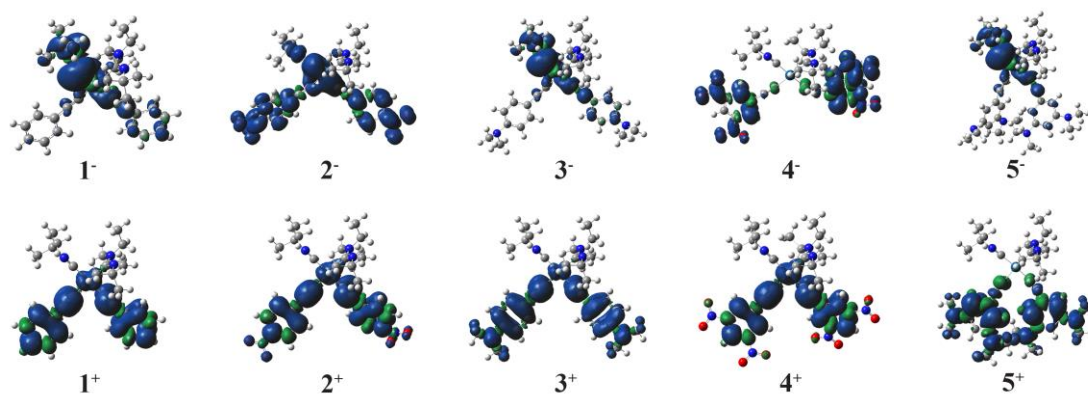

**Fig. S1** Spin density diagrams for one-electron reduced and oxidized species of complexes 1-5.

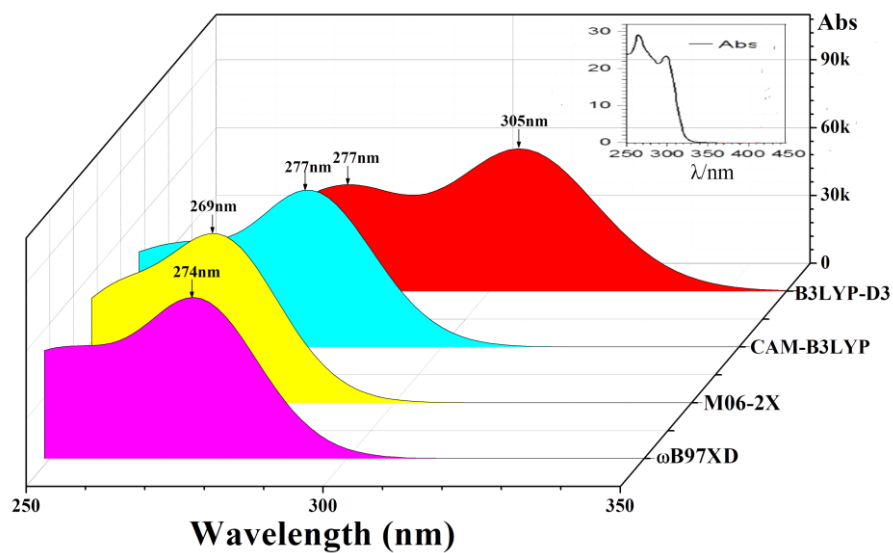

**Fig. S2** Simulated absorption spectra of complex 1 in DCM solvent by four functionals and the experimental result (inset)<sup>44</sup> (The units of Abs: L/mol/cm).

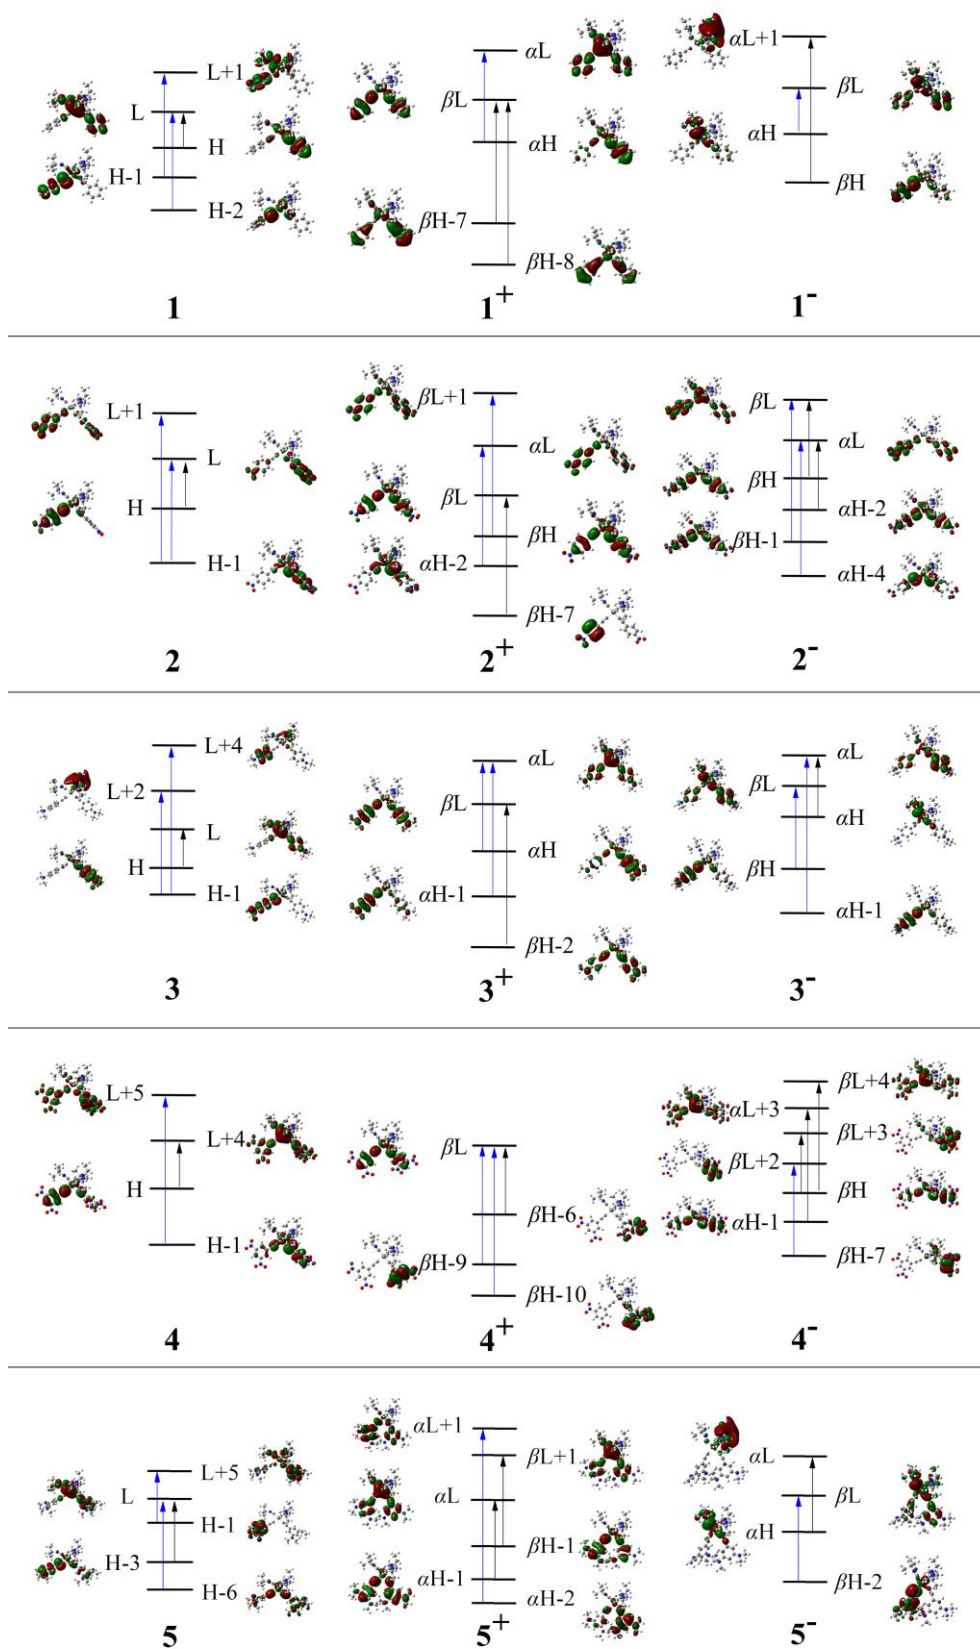

**Fig. S3** Molecular orbitals involved in crucial charge transitions of complexes 1-5 and

$1^{+/-} - 5^{+/-}$ .



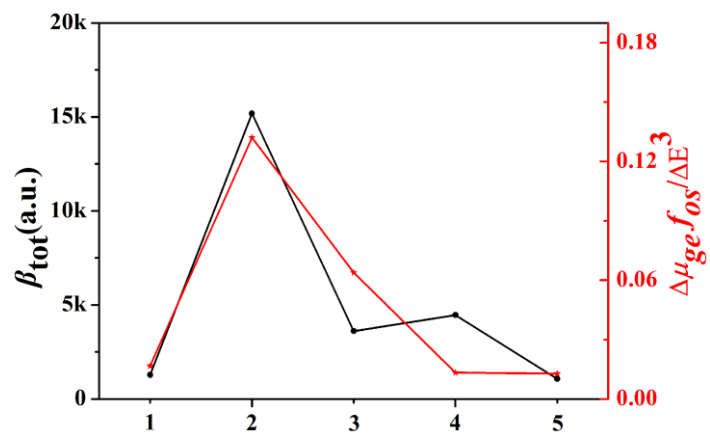

**Fig. S4** Relationship between the  $\beta_{\text{tot}}$  values and the corresponding  $\Delta\mu_{\text{eg}}f_{\text{os}}/\Delta E^3$  values for complexes 1-5.

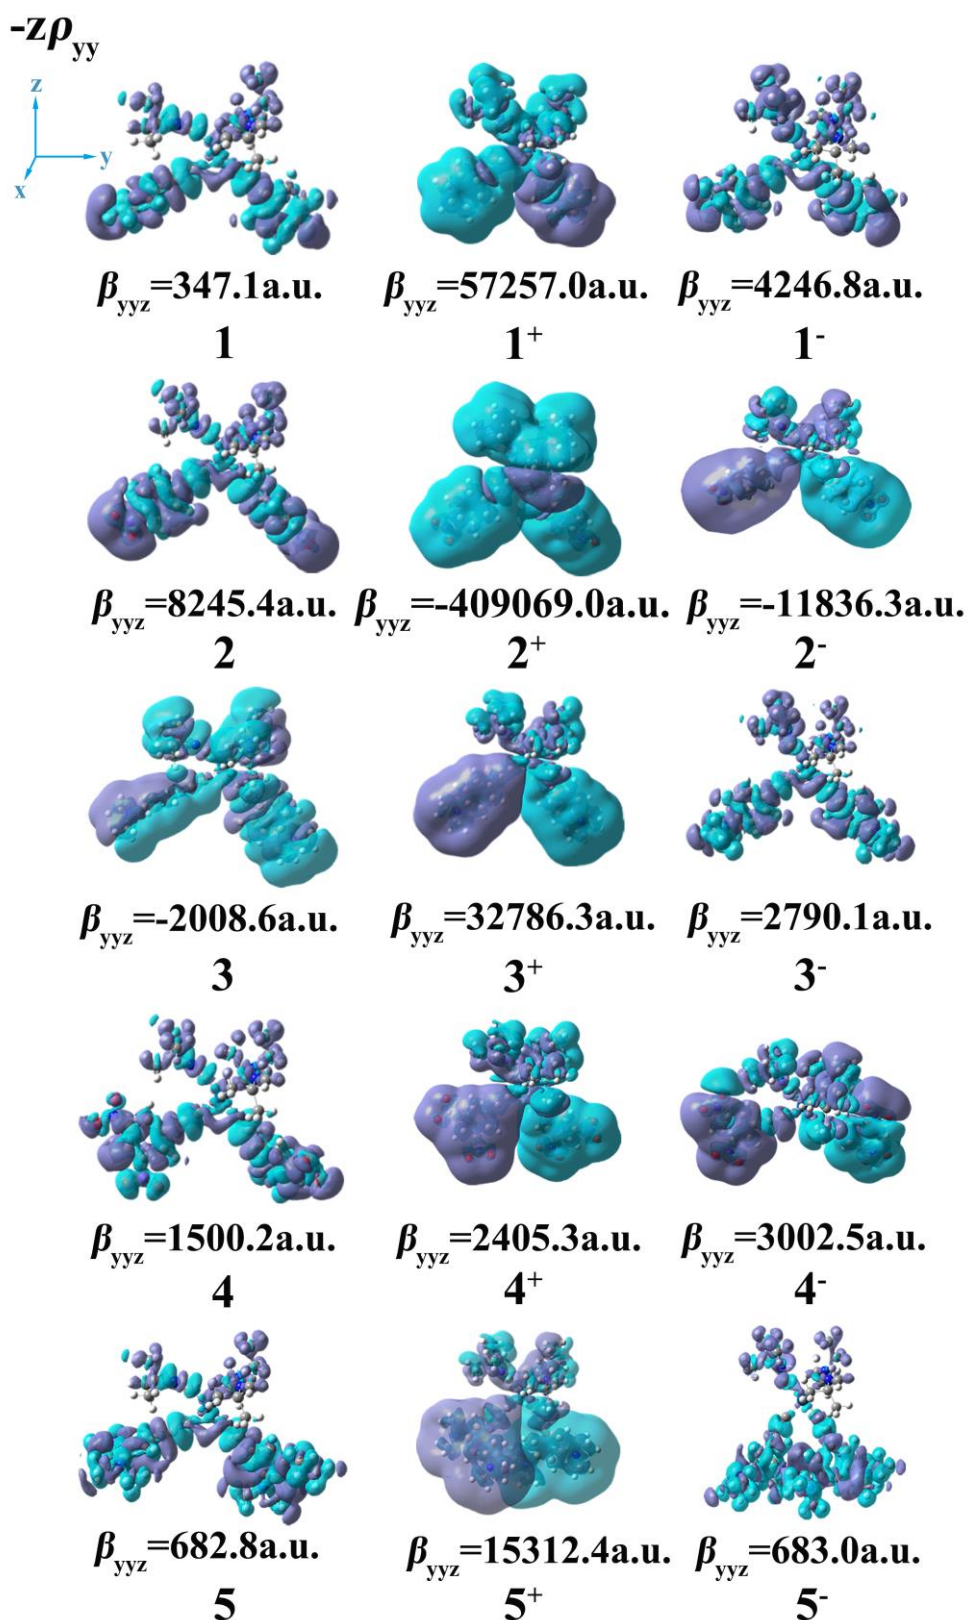

**Fig. S5** Plots of  $-z\rho_{yy}^{(2)}$  for all studied complexes at the CAM-B3LYP/6-311G+(d)/SDD level of theory. Purple color represents a positive value and blue color represents a negative value.
